# Supplementary material for: Effects of Saturated Fat, Polyunsaturated Fat, Monounsaturated Fat, and Carbohydrate on Glucose-Insulin Homeostasis: A Systematic Review and Meta-analysis of Randomised Controlled Feeding Trials
Source: PubMed Central journal article supplement (PMC4951141; doi:10.1371/journal.pmed.1002087), 2016-07-19
Supplement: pmed.1002087.s003.pdf [file pmed.1002087.s003.pdf]

**S1 Table.** Characteristics of 102 randomized controlled feeding trials evaluated in the meta-analysis of effects of diets with different macronutrient compositions on glucose-insulin homeostasis.

| Author, publication year, Location (Reference) | Design        | N arms | Length days* | Dietary arms         | N adults | Mean age (SD or range), years | Men, % | Mean BMI, kg/m <sup>2</sup> | Glucose, mmol/L† | Macronutrient intake CHO/SFA/MUFA/PUFA % of energy‡ | Measures § | Quality score |
|------------------------------------------------|---------------|--------|--------------|----------------------|----------|-------------------------------|--------|-----------------------------|------------------|-----------------------------------------------------|------------|---------------|
| <b>Trials of healthy adults</b>                |               |        |              |                      |          |                               |        |                             |                  |                                                     |            |               |
| Coulston, 1983<br>United States [56]           | Crossover     | 2      | 10           | High CHO             | 11       | 45 (22-67)                    | 45.5   | 24.9                        | 5.1              | 60 / 5.8 / 8.3 / 6.9                                | Fasting    | 6.0           |
|                                                |               |        |              | Low CHO              | 11       | 45 (22-67)                    | 45.5   | 24.9                        | 5.1              | 40 / 11 / 16 / 14                                   |            |               |
| Gustafsson, 1992<br>Sweden [80]                | Parallel      | 2      | 21           | MUFA                 | 17       | 58.4 (52-72)                  | 37.5   | 24.9                        | 4.9              | 56 / 7.3 / 15 / 4.8                                 | Fasting    | 7.0           |
|                                                |               |        |              | PUFA                 | 19       | 58.4 (40-65)                  | 37.5   | 24.6                        | 5.0              | 56 / 7.8 / 8.4 / 10                                 |            |               |
| Nydahl, 1994<br>Sweden [36]                    | Crossover     | 2      | 25           | High MUFA            | 26       | 51.2 (23-74)                  | 69.2   | 25.6                        | 5.0              | 55 / 8 / 15 / 4                                     | Fasting    | 7.0           |
|                                                |               |        |              | High PUFA            | 26       | 51.2 (23-74)                  | 69.2   | 25.6                        | 5.0              | 56 / 8 / 8 / 11                                     |            |               |
| Uusitupa, 1994<br>Finland [44]                 | Crossover     | 2      | 21           | MUFA                 | 7        | 23 (1.6)                      | 0      | 21.5                        | 4.5              | 44 / 8.5 / 19 / 10                                  | Fasting    | 7.5           |
|                                                |               |        |              | SFA                  | 7        | 23 (1.6)                      | 0      | 21.5                        | 4.5              | 45 / 20 / 12 / 3.9                                  |            |               |
| Nydahl, 1995<br>Sweden [112]                   | Crossover     | 2      | 25           | Canola oil           | 22       | 54.2 (35-69)                  | 54.5   | 25.3                        | 5.2              | 56 / 7.8 / 14 / 8.9                                 | Fasting    | 8.0           |
|                                                |               |        |              | Olive oil            | 22       | 54.2 (35-69)                  | 54.5   | 25.3                        | 5.0              | 56 / 8.7 / 16 / 5.5                                 |            |               |
| Schwab, 1995<br>Finland [68]                   | Crossover     | 2      | 28           | Lauric acid diet     | 15       | 23.9 (4.6)                    | 0      | 21.4                        | 5.0              | 46 / 20 / 10 / 4.9                                  | Fasting    | 8.5           |
|                                                |               |        |              | Palmitic acid diet   | 15       | 23.9 (4.6)                    | 0      | 21.4                        | 5.0              | 44 / 19 / 13 / 5.2                                  | IV         |               |
| Espino-Montoro, 1996<br>Spain [117]            | Crossover     | 2      | 28           | Olive oil            | 20       | 22.5 (19-26)                  | 100    | 24.4                        | 5.3              | 46 / 9.8 / 25 / 4.5                                 | Fasting    | 7.5           |
|                                                |               |        |              | Sunflower oil        | 20       | 22.5 (19-26)                  | 100    | 24.4                        | 5.3              | 46 / 9 / 26 / 4.9                                   |            |               |
| Niskanen, 1997<br>Finland [39]                 | Parallel      | 2      | 56           | MUFA                 | 14       | 55.4 (5.7)                    | 64.3   | 29.1                        | 6.4              | 43 / 11 / 19 / 8                                    | Fasting    | 8.0           |
|                                                |               |        |              | PUFA                 | 17       | 55.0 (5.3)                    | 52.9   | 30.8                        | 6.2              | 46 / 11 / 10 / 10                                   | IV         |               |
| Jeppesen, 1997<br>United States [42]           | Crossover     | 2      | 21           | High CHO             | 10       | 66 (5.0)                      | 0      | 27.0                        | 4.9              | 40 / 14 / 17 / 14                                   | Fasting    | 7.0           |
|                                                |               |        |              | Low CHO              | 10       | 66 (5.0)                      | 0      | 27.0                        | 5.1              | 60 / 7.8 / 9.4 / 7.8                                |            |               |
| Schwab, 1997<br>Finland [43]                   | Crossover     | 2      | 21           | PUFA                 | 8        | 23 (21-25)                    | 0      | 21.1                        | 4.0              | 44 / 10 / 11 / 18                                   | Fasting    | 8.5           |
|                                                |               |        |              | SFA                  | 8        | 23 (21-25)                    | 0      | 21.1                        | 4.0              | 44 / 21 / 13 / 5                                    |            |               |
| Louheranta, 1998<br>Finland [66]               | Crossover     | 2      | 28           | Oleic acid           | 15       | 22 (2.3)                      | 0      | 22.6                        | 4.7              | 42 / 13 / 19 / 6.4                                  | Fasting    | 7.0           |
|                                                |               |        |              | Stearic acid         | 15       | 22 (2.3)                      | 0      | 22.6                        | 4.7              | 45 / 19 / 12 / 6.4                                  | IV         |               |
| Lovejoy, 1998<br>United States [22]**          | Crossover     | 2      | 21           | High fat, AA         | 20       | 36.6 (1.4)                    | 100    | 31.9                        | 5.2              | 35 / 20 / 19 / 11                                   | Fasting    | 7.5           |
|                                                |               |        |              | Low fat, AA          | 20       | 36.6 (1.4)                    | 100    | 31.9                        | 5.2              | 55 / 7.4 / 8.4 / 4.2                                | IV         |               |
|                                                | Crossover     | 2      | 21           | High fat, White      | 11       | 34.4 (1.8)                    | 100    | 30.2                        | 5.2              | 35 / 20 / 19 / 11                                   | Fasting    | 7.5           |
|                                                |               |        |              | Low fat, White       | 11       | 34.4 (1.8)                    | 100    | 30.2                        | 5.2              | 55 / 7.4 / 8.4 / 4.2                                | IV         |               |
| Louheranta, 1999<br>Finland [70]               | Crossover     | 2      | 28           | MUFA                 | 14       | 23 (3.0)                      | 0      | 20.8                        | 5.0              | 50 / 13 / 19 / 5.8                                  | Fasting    | 8.5           |
|                                                |               |        |              | Trans fat            | 14       | 23 (3.0)                      | 0      | 20.8                        | 5.0              | 50 / 11 / 19 / 6.5                                  | IV         |               |
| Thomsen, 1999<br>Denmark [72]                  | Crossover     | 2      | 28           | CHO                  | 16       | 35 (2.0)                      | 37.5   | 25.8                        | 4.2              | 53 / 8.8 / 8.1 / 6.7                                | Fasting    | 10.0          |
|                                                |               |        |              | MUFA                 | 16       | 35 (2.0)                      | 37.5   | 25.8                        | 4.2              | 41 / 9.4 / 24 / 5.5                                 | IV         |               |
| Louheranta, 2000<br>Finland [69]               | Crossover     | 2      | 28           | Low fat              | 18       | 53 (8.5)                      | 72.2   | 29.6                        | 6.1              | 47 / 8.4 / 18 / 7.8                                 | Fasting    | 7.5           |
|                                                |               |        |              | MUFA                 | 18       | 53 (8.5)                      | 72.2   | 29.6                        | 6.1              | 43 / 10 / 22 / 6.9                                  | IV         |               |
| Matthan, 2001<br>United States [21]**          | Latino Square | 6      | 35           | Butter               | 18       | 60 (7.0)                      | 100    | 28.1                        | 5.3              | 54 / 17 / 8.1 / 2.4                                 | Fasting    | 9.0           |
|                                                |               |        |              | PHSO                 | 18       | 60 (7.0)                      | 100    | 28.1                        | 5.1              | 56 / 7.3 / 8.1 / 12                                 |            |               |
|                                                |               |        |              | Semiliquid margarine | 18       | 60 (7.0)                      | 100    | 28.1                        | 5.2              | 52 / 8.6 / 8.1 / 14                                 |            |               |
|                                                |               |        |              | Shortening           | 18       | 60 (7.0)                      | 100    | 28.1                        | 5.3              | 53 / 8.6 / 9.9 / 8.1                                |            |               |
|                                                |               |        |              | Soft margarine       | 18       | 60 (7.0)                      | 100    | 28.1                        | 5.1              | 53 / 8.4 / 8 / 11                                   |            |               |
|                                                |               |        |              | Stick margarine      | 18       | 60 (7.0)                      | 100    | 28.1                        | 5.2              | 54 / 8.5 / 8.5 / 6.3                                |            |               |
|                                                | Latino Square | 6      | 35           | Butter               | 18       | 67 (4.0)                      | 0      | 26.5                        | 5.2              | 54 / 17 / 8.1 / 2.4                                 | Fasting    | 9.0           |
|                                                |               |        |              | PHSO                 | 18       | 67 (4.0)                      | 0      | 26.5                        | 5.1              | 56 / 7.3 / 8.1 / 12                                 |            |               |

**S1 Table.** Characteristics of 102 randomized controlled feeding trials evaluated in the meta-analysis of effects of diets with different macronutrient compositions on glucose-insulin homeostasis.

| Author, publication year, Location (Reference) | Design    | N arms | Length days* | Dietary arms            | N adults | Mean age (SD or range), years | Men, % | Mean BMI, kg/m <sup>2</sup> | Glucose, mmol/L† | Macronutrient intake CHO/SFA/MUFA/PUFA % of energy‡ | Measures §     | Quality score |
|------------------------------------------------|-----------|--------|--------------|-------------------------|----------|-------------------------------|--------|-----------------------------|------------------|-----------------------------------------------------|----------------|---------------|
|                                                |           |        |              | Semiliquid margarine    | 18       | 67 (4.0)                      | 0      | 26.5                        | 5.1              | 52 / 8.6 / 8.1 / 14                                 |                |               |
|                                                |           |        |              | Shortening              | 18       | 67 (4.0)                      | 0      | 26.5                        | 5.2              | 53 / 8.6 / 9.9 / 8.1                                |                |               |
|                                                |           |        |              | Soft margarine          | 18       | 67 (4.0)                      | 0      | 26.5                        | 5.0              | 53 / 8.4 / 8 / 11                                   |                |               |
|                                                |           |        |              | Stick margarine         | 18       | 67 (4.0)                      | 0      | 26.5                        | 5.1              | 54 / 8.5 / 8.5 / 6.3                                |                |               |
| Kriketos, 2001<br>United States [53]           | Parallel  | 3      | 70           | Omega-3 PUFA            | 16       | 46.9                          | 37.5   | 33.4                        | 5.6              | 50 / 9.3 / 23 / 9.3                                 | Fasting<br>IV  | 6.5           |
|                                                |           |        |              | Omega-6 PUFA            | 17       | 47.0                          | 35.3   | 33.5                        | 5.5              | 50 / 9.3 / 23 / 9.3                                 |                |               |
|                                                |           |        |              | SFA                     | 19       | 47.0                          | 31.6   | 33.5                        | 6.1              | 50 / 12 / 29 / 3                                    |                |               |
| Vidon, 2001<br>France [31]                     | Crossover | 2      | 21           | High fat                | 7        | 40 (22-48)                    | 42.9   | 20-27                       | 4.8              | 41 / 14 / 15 / 14                                   | Fasting<br>OTT | 6.5           |
|                                                |           |        |              | High CHO                | 7        | 40 (22-48)                    | 42.9   | 20-27                       | 4.3              | 55 / 10 / 10 / 11                                   |                |               |
| Perez-Jimenez, 2001<br>Spain [118]             | Crossover | 2      | 28           | High CHO                | 59       | 23.1 (1.8)                    | 50.8   | 22.9                        | 4.9              | 55 / 9.2 / 14 / 5.2                                 | Fasting        | 7.0           |
|                                                |           |        |              | Mediterranean           | 59       | 23.1 (1.8)                    | 50.8   | 22.9                        | 4.9              | 44 / 9.2 / 24 / 4.8                                 |                |               |
| Poppitt, 2002<br>New Zealand [29]              | Crossover | 2      | 21           | Control butter          | 20       | 23 (4.2)                      | 100    | 21.7                        | 4.7              | 47 / 20 / 6 / 14                                    | Fasting        | 8.0           |
|                                                |           |        |              | Modified butter         | 20       | 23 (4.2)                      | 100    | 21.8                        | 4.7              | 48 / 15 / 8 / 16                                    |                |               |
| Kratz, 2002<br>Germany [23]**                  | Parallel  | 3      | 28           | Olive oil               | 10       | 25.7 (5.4)                    | 100    | 23.0                        | 4.4              | 47 / 11 / 23 / 3.4                                  | Fasting        | 8.0           |
|                                                |           |        |              | Rapeseed oil            | 10       | 25.7 (5.4)                    | 100    | 23.0                        | 4.4              | 47 / 9.1 / 19 / 8.9                                 |                |               |
|                                                |           |        |              | Sunflower oil           | 10       | 25.7 (5.4)                    | 100    | 23.0                        | 4.5              | 48 / 10 / 8.7 / 18                                  |                |               |
|                                                | Parallel  | 3      | 28           | Olive oil               | 9        | 25.7 (5.4)                    | 0      | 23.0                        | 4.1              | 47 / 11 / 23 / 3.4                                  | Fasting        | 8.0           |
|                                                |           |        |              | Rapeseed oil            | 7        | 25.7 (5.4)                    | 0      | 23.0                        | 4.3              | 47 / 9.1 / 19 / 8.9                                 |                |               |
|                                                |           |        |              | Sunflower oil           | 9        | 25.7 (5.4)                    | 0      | 23.0                        | 4.2              | 48 / 10 / 8.7 / 18                                  |                |               |
| Lovejoy, 2002<br>United States [23]**          | Crossover | 3      | 28           | MUFA                    | 25       | 28 (10.0)                     | 48.0   | 23.5                        | 4.9              | 57 / 5.8 / 15 / 6.3                                 | Fasting<br>IV  | 9.0           |
|                                                |           |        |              | SFA                     | 25       | 28 (10.0)                     | 48.0   | 23.5                        | 4.8              | 58 / 11 / 9.3 / 6.4                                 |                |               |
|                                                |           |        |              | Trans fat               | 25       | 28 (10.0)                     | 48.0   | 23.5                        | 4.7              | 58 / 7.3 / 8.4 / 4                                  |                |               |
| Clifton, 2004<br>Australia [119]               | Parallel  | 2      | 84           | High MUFA               | 31       | 47.1 (10.7)                   | 0      | 35.0                        | 5.0              | 44 / 6.4 / 20 / 6.6                                 | Fasting        | 8.0           |
|                                                |           |        |              | Very low fat            | 31       | 46.9 (9.9)                    | 0      | 34.7                        | 5.1              | 65 / 4.1 / 3.7 / 2.1                                |                |               |
| Johnston, 2004<br>United States [58]           | Parallel  | 2      | 42           | High CHO, low fat       | 7        | 36.4 (4.2)                    | 14.3   | 28.7                        | 5.2              | 66 / 5.8 / 4.2 / 2.1                                | Fasting        | 7.5           |
|                                                |           |        |              | High prot, low fat      | 9        | 40.1 (3.6)                    | 11.1   | 29.1                        | 5.3              | 40 / 7.9 / 11 / 5.4                                 |                |               |
| Hwalla, 2004<br>Lebanon [86]                   | Parallel  | 2      | 28           | High MUFA               | 7        | 28.6 (19-48)                  | 100    | 34.8                        | 5.3              | 35 / 10 / 30 / 5                                    | Fasting        | 7.5           |
|                                                |           |        |              | High CHO                | 8        | 28.6 (19-48)                  | 100    | 35.2                        | 5.2              | 60 / 9 / 4 / 7                                      |                |               |
| Segal-Isaacson, 2004<br>United States [87]     | Crossover | 2      | 42           | Low CHO                 | 4        | 52.3 (3.8)                    | 0      | 33.3                        | 5.3              | 5 / 22 / 22 / 21                                    | Fasting        | 9.0           |
|                                                |           |        |              | Low fat                 | 4        | 52.3 (3.8)                    | 0      | 33.3                        | 5.3              | 50 / 6 / 8 / 6                                      |                |               |
| Luscombe-Marsh, 2005<br>Australia [77]         | Parallel  | 2      | 112          | High fat, standard prot | 30       | 48.9 (23.2)                   | 43.3   | 34.6                        | 5.8              | 35 / 9.2 / 23 / 9.3                                 | Fasting        | 8.5           |
|                                                |           |        |              | Low fat, high prot      | 27       | 51.7 (18.7)                   | 44.4   | 33.4                        | 5.6              | 35 / 9.3 / 14 / 3.8                                 |                |               |
| Noakes, 2005<br>Australia [78]                 | Parallel  | 2      | 84           | High prot               | 52       | 50 (10.0)                     | 0      | 32.0                        | 6.2              | 44 / 5.4 / 9.4 / 4.7                                | Fasting        | 8.0           |
|                                                |           |        |              | Low prot                | 48       | 49 (9.0)                      | 0      | 33.0                        | 6.1              | 61 / 4.6 / 8.3 / 4.7                                |                |               |
| Keogh, 2005<br>Australia [120]                 | Crossover | 4      | 21           | CHO                     | 40       | 55.9 (10.7)                   | 47.5   | 27.3                        | 5.3†             | 65 / 7 / 6 / 3                                      | Fasting        | 8.0           |
|                                                |           |        |              | MUFA                    | 40       | 55.9 (10.7)                   | 47.5   | 27.3                        | 5.3              | 44 / 8 / 19 / 7                                     |                |               |
|                                                |           |        |              | PUFA                    | 40       | 55.9 (10.7)                   | 47.5   | 27.3                        | 5.4              | 45 / 9 / 10 / 15                                    |                |               |
|                                                |           |        |              | SFA                     | 40       | 55.9 (10.7)                   | 47.5   | 27.3                        | 5.9              | 45 / 19 / 12 / 4                                    |                |               |
| Johnston, 2006<br>United States [120]          | Parallel  | 2      | 42           | Ketogenic low CHO       | 9        | 38.4 (11.7)                   | 22.2   | 35.0                        | 5.5              | 9 / 21 / 20 / 8                                     | Fasting        | 8.5           |
|                                                |           |        |              | Non-ketogenic low CHO   | 10       | 37.2 (12.3)                   | 20.0   | 34.6                        | 5.2              | 42 / 8 / 10 / 4                                     |                |               |
| Tricon, 2006                                   | Crossover | 2      | 36           | CLA-rich dairy          | 32       | 45.5 (8.7)                    | 100    | 25.0                        | 5.1              | 45 / 11 / 8.1 / 4.1                                 | Fasting        | 9.0           |

**S1 Table.** Characteristics of 102 randomized controlled feeding trials evaluated in the meta-analysis of effects of diets with different macronutrient compositions on glucose-insulin homeostasis.

| Author, publication year, Location (Reference) | Design           | N arms | Length days* | Dietary arms                 | N adults    | Mean age (SD or range), years | Men, % | Mean BMI, kg/m <sup>2</sup> | Glucose, mmol/L†     | Macronutrient intake CHO/SFA/MUFA/PUFA % of energy‡ | Measures §     | Quality score |
|------------------------------------------------|------------------|--------|--------------|------------------------------|-------------|-------------------------------|--------|-----------------------------|----------------------|-----------------------------------------------------|----------------|---------------|
| United Kingdom [37]                            |                  |        |              | Normal dairy                 | 32          | 45.5 (8.7)                    | 100    | 25.0                        | 5.1                  | 45 / 13 / 9.1 / 5.2                                 |                |               |
| Schutte, 2006                                  | Parallel         | 3      | 56           | Cashew                       | 21          | 45.7 (22.0)                   | 38.1   | 34.7                        | 4.8                  | 44 / 9.3 / 16 / 7.8                                 | Fasting        | 8.5           |
| Control                                        |                  |        |              | 21                           | 44.4 (18.5) | 47.6                          | 35.5   | 4.9                         | 47 / 12 / 11 / 9.5   |                                                     |                |               |
| Walnut                                         |                  |        |              | 20                           | 45.5 (22.2) | 50.0                          | 35.9   | 4.8                         | 42 / 8.2 / 11 / 21   |                                                     |                |               |
| Noakes, 2006                                   | Parallel         | 3      | 84           | High PUFA                    | 21          | 46.1 (9.5)                    | 25.0   | 33.4                        | 5.4                  | 48 / 5.6 / 12 / 7.5                                 | Fasting<br>OTT | 8.5           |
| Low CHO                                        |                  |        |              | 24                           | 48.4 (8.0)  | 16.7                          | 32.5   | 5.3                         | 10 / 18 / 27 / 6.4   |                                                     |                |               |
| Low fat                                        |                  |        |              | 22                           | 50.7 (10.3) | 22.7                          | 32.6   | 5.3                         | 67 / 4.7 / 3.4 / 1.7 |                                                     |                |               |
| Tholstrup, 2006                                | Parallel         | 2      | 35           | Control                      | 20          | 26.1 (3.6)                    | 100    | 22.5                        | 4.7                  | 46 / 24 / 9.6 / 3.6                                 | Fasting        | 8.0           |
| Denmark [97]                                   |                  |        |              | Vaccenic acid diet           | 22          | 25.2 (3.9)                    | 100    | 23.0                        | 4.8                  | 42 / 23 / 15 / 3.8                                  |                |               |
| Vega-Lopez, 2006                               | Crossover        | 2      | 35           | Canola oil                   | 15          | 63.9 (5.7)                    | 33.3   | 26.0                        | 4.9                  | 53 / 6.4 / 15 / 8.7                                 | Fasting        | 8.0           |
| United States [107]                            |                  |        |              | Palm oil                     | 15          | 63.9 (5.7)                    | 33.3   | 26.0                        | 5.0                  | 52 / 15 / 11 / 3.5                                  |                |               |
| Berglund, 2007                                 | Crossover        | 3      | 49           | Average American diet        | 85          | 35.5 (9.4)                    | 61.2   | 27.6                        | 5.2                  | 49 / 16 / 14 / 5.8                                  | Fasting        | 8.5           |
| United States [105]                            |                  |        |              | CHO diet                     | 85          | 35.5 (9.4)                    | 61.2   | 27.6                        | 5.2                  | 55 / 8 / 16 / 5.5                                   |                |               |
|                                                |                  |        |              | MUFA diet                    | 85          | 35.5 (9.4)                    | 61.2   | 27.6                        | 5.2                  | 49 / 8.7 / 21 / 6.2                                 |                |               |
| St-Onge, 2007                                  | Crossover        | 3      | 25           | High PUFA                    | 33          | 43.6 (2.5)                    | 21.2   | 29.4                        | 5.2                  | 49 / 8.5 / 15 / 9.7                                 | Fasting        | 8.0           |
| United States [38]                             |                  |        |              | High SFA                     | 33          | 43.6 (2.5)                    | 21.2   | 29.4                        | 5.2                  | 46 / 11 / 16 / 5.8                                  |                |               |
|                                                |                  |        |              | High CHO                     | 33          | 43.6 (2.5)                    | 21.2   | 29.4                        | 5.1                  | 55 / 8.5 / 14 / 5.2                                 |                |               |
| Paniagua, 2007                                 | Latino<br>Square | 3      | 28           | CHO                          | 10          | 62.3 (9.4)                    | 36.4   | 32.6                        | 5.5                  | 65 / 6 / 8 / 6                                      | Fasting        | 8.5           |
| Spain [108]                                    |                  |        |              | MUFA                         | 11          | 62.3 (9.4)                    | 36.4   | 32.6                        | 5.5                  | 47 / 9 / 23 / 6                                     |                |               |
|                                                |                  |        |              | SFA                          | 11          | 62.3 (9.4)                    | 36.4   | 32.6                        | 5.5                  | 47 / 23 / 9 / 6                                     |                |               |
| Sundram, 2007                                  | Crossover        | 3      | 28           | Esterified fat               | 30          | 30.0 (8.0)                    | 34.4   | 22.0                        | 5.4                  | 53 / 18 / 5.9 / 7                                   | Fasting        | 9.0           |
| Malaysia [33]                                  |                  |        |              | PHSO                         | 30          | 30.0 (8.0)                    | 34.4   | 22.0                        | 5.4                  | 53 / 9.1 / 12 / 5.8                                 |                |               |
|                                                |                  |        |              | Palm oil                     | 30          | 30.0 (8.0)                    | 34.4   | 22.0                        | 5.4                  | 53 / 14 / 14 / 3.6                                  |                |               |
| Egert, 2008                                    | Parallel         | 3      | 21           | ALA                          | 15          | 25.9 (6.8)                    | 27.1   | 22.2                        | 4.3                  | 44 / 9.1 / 19 / 9.8                                 | Fasting        | 8.0           |
| Germany [106]                                  |                  |        |              | DHA                          | 16          | 25.9 (6.8)                    | 27.1   | 22.2                        | 4.3                  | 44 / 8.7 / 20 / 9.8                                 |                |               |
|                                                |                  |        |              | EPA                          | 17          | 25.9 (6.8)                    | 27.1   | 22.2                        | 4.1                  | 44 / 8.7 / 20 / 9.9                                 |                |               |
| Mensink, 2008                                  | Crossover        | 2      | 21           | Oleic acid, high trans-fat   | 44          | 41.0 (21.1)                   | 25.0   | 23.9                        | 5.5                  | 44 / 12 / 19 / 6.2                                  | Fasting        | 10.0          |
| Netherlands [85]                               |                  |        |              | Palmitic acid, low trans-fat | 44          | 41.0 (21.1)                   | 25.0   | 23.9                        | 5.5                  | 45 / 15 / 16 / 6.2                                  |                |               |
| Tay, 2008                                      | Parallel         | 2      | 168          | High CHO low fat             | 43          | 51.0 (7.5)                    | 39.5   | 33.5                        | 5.6                  | 47 / 6 / 12 / 7                                     | Fasting        | 8.0           |
| Australia [122]                                |                  |        |              | Low CHO high fat             | 45          | 50.3 (8.4)                    | 31.1   | 33.9                        | 5.7                  | 5.1 / 21 / 25 / 8                                   |                |               |
| Vega-Lopez, 2009                               | Crossover        | 2      | 14           | Corn oil                     | 30          | 64.2 (7.5)                    | 0      | 25.6                        | 5.1                  | 57 / 5.7 / 7.2 / 12                                 | Fasting        | 7.5           |
| United States [113]                            |                  |        |              | PHSO                         | 30          | 64.2 (7.5)                    | 0      | 25.6                        | 5.1                  | 57 / 6.3 / 7.8 / 5.9                                |                |               |
| Bradley, 2009                                  | Parallel         | 2      | 56           | Low CHO                      | 12          | 37.1 (8.9)                    | 37.5   | 34.5                        | 5.5                  | 20 / 21 / 21 / 13                                   | Fasting<br>OTT | 8.0           |
| United Kingdom [62]                            |                  |        |              | Low fat                      | 12          | 40.5 (10.4)                   | 37.5   | 32.8                        | 5.6                  | 60 / 7 / 6 / 3                                      |                |               |
| Tardy, 2009                                    | Parallel         | 3      | 28           | Dairy trans-fat              | 20          | 40 (18-50)                    | 0      | 32.7                        | 5.3                  | 45 / 16 / 16 / 6                                    | Fasting        | 9.5           |
| France [30]                                    |                  |        |              | Industrial trans-fat         | 19          | 40 (18-50)                    | 0      | 32.9                        | 5.4                  | 42 / 14 / 19 / 7.2                                  |                |               |
|                                                |                  |        |              | Low trans-fat                | 19          | 40 (18-50)                    | 0      | 32.7                        | 5.2                  | 43 / 14 / 20 / 7.2                                  |                |               |
| Jebb, 2010                                     | Parallel         | 2      | 168          | High MUFA, low GI            | 100         | 51.4 (10.0)                   | 42.0   | 28.5                        | 5.4                  | 45 / 9.6 / 16 / 6.9                                 | Fasting<br>IV  | 8.0           |
| United Kingdom [27]**                          |                  |        |              | Low fat, low GI              | 108         | 51.4 (10.0)                   | 42.0   | 28.5                        | 5.4                  | 52 / 8.3 / 9.7 / 5.1                                |                |               |
|                                                | Parallel         | 3      | 168          | High MUFA, high GI           | 104         | 51.4 (10.0)                   | 42.0   | 28.5                        | 5.4                  | 45 / 9.5 / 16 / 6.6                                 | Fasting        | 8.0           |

**S1 Table.** Characteristics of 102 randomized controlled feeding trials evaluated in the meta-analysis of effects of diets with different macronutrient compositions on glucose-insulin homeostasis.

| Author, publication year, Location (Reference) | Design    | N arms | Length days* | Dietary arms             | N adults | Mean age (SD or range), years | Men, % | Mean BMI, kg/m <sup>2</sup> | Glucose, mmol/L† | Macronutrient intake CHO/SFA/MUFA/PUFA % of energy‡ | Measures § | Quality score |
|------------------------------------------------|-----------|--------|--------------|--------------------------|----------|-------------------------------|--------|-----------------------------|------------------|-----------------------------------------------------|------------|---------------|
|                                                |           |        |              | High SFA, high GI        | 79       | 51.4 (10.0)                   | 42.0   | 28.5                        | 5.4              | 42 / 16 / 12 / 5.8                                  | IV         |               |
|                                                |           |        |              | Low fat, high GI         | 108      | 51.4 (10.0)                   | 42.0   | 28.5                        | 5.4              | 51 / 9.2 / 9.8 / 5.2                                |            |               |
| Forsythe, 2010 United States [114]             | Crossover | 2      | 42           | PUFA                     | 8        | 45 (7.9)                      | 100    | 30.0                        | 6.0              | 12 / 17 / 25 / 15                                   | Fasting    | 6.5           |
|                                                |           |        |              | SFA                      | 8        | 45 (7.9)                      | 100    | 30.0                        | 6.0              | 13 / 31 / 21 / 4.5                                  |            |               |
| Bos, 2010 Netherlands [123]                    | Parallel  | 2      | 56           | High MUFA                | 18       | 58.9 (5.1)                    | 44.0   | 27.6                        | 5.2              | 46 / 11 / 20 / 7                                    | Fasting    | 9.5           |
|                                                |           |        |              | High SFA                 | 19       | 52.0 (7.2)                    | 42.0   | 26.1                        | 5.4              | 47 / 19 / 11 / 5.4                                  |            |               |
| Yeung, 2010 United States [47]                 | Crossover | 2      | 42           | CHO                      | 161      | 53.6 (10.9)                   | 55.0   | 30.2                        | 5.2              | 58 / 6 / 13 / 8                                     | Fasting    | 8.0           |
|                                                |           |        |              | Unsaturated fat          | 161      | 53.6 (10.9)                   | 55.0   | 30.2                        | 5.2              | 48 / 6 / 21 / 10                                    |            |               |
| Bendsen, 2011 Denmark [91]                     | Parallel  | 2      | 112          | Control fat              | 25       | 58.8 (5.5)                    | 0      | 28.1                        | 5.3              | 44 / 12 / 14 / 4.3                                  | Fasting    | 9.0           |
|                                                |           |        |              | Trans fat                | 24       | 58.5 (4.6)                    | 0      | 28.8                        | 5.2              | 44 / 11 / 10 / 4.5                                  |            |               |
| Goree, 2011 United States [46]                 | Parallel  | 2      | 56           | Reduced CHO, high fat    | 34       | 35.6 (8.5)                    | 43.0   | 33.3                        | 5.5              | 43 / 12 / 13 / 11                                   | Fasting    | 7.0           |
|                                                |           |        |              | Standard diet            | 29       | 34.6 (8.1)                    | 48.0   | 31.3                        | 5.4              | 56 / 8.3 / 9.8 / 7.8                                |            |               |
| Hjerpsted, 2011 Denmark [98]                   | Crossover | 2      | 42           | Butter                   | 49       | 55.5 (12.4)                   | 57.0   | 25.3                        | 5.6              | 48 / 16 / 11 / 4.6                                  | Fasting    | 6.0           |
|                                                |           |        |              | Cheese                   | 49       | 55.5 (12.4)                   | 57.0   | 25.3                        | 5.6              | 45 / 15 / 10 / 4.4                                  |            |               |
| Iggman, 2011 Sweden [40]                       | Crossover | 2      | 21           | Rapeseed oil             | 20       | 50.9 (10.0)                   | 70.0   | 26.3                        | 5.5              | 49 / 7.8 / 16 / 8.7                                 | Fasting    | 8.0           |
|                                                |           |        |              | SFA or dairy FA          | 20       | 50.9 (10.0)                   | 70.0   | 26.3                        | 5.5              | 49 / 19 / 11 / 3.6                                  |            |               |
| Johnstone, 2011 Scotland [92]                  | Crossover | 2      | 28           | Low CHO                  | 16       | 55 (14.0)                     | 100    | 35.8                        | 5.8              | 4.7 / 21 / 29 / 12                                  | Fasting    | 7.0           |
|                                                |           |        |              | Mod CHO                  | 16       | 55 (14.0)                     | 100    | 35.8                        | 5.8              | 37 / 12 / 15 / 5.4                                  |            |               |
| Tholstrup, 2011 Denmark [124]                  | Crossover | 3      | 21           | Lard                     | 32       | 29.6 (10.3)                   | 100    | 22.9                        | 5.3              | 49 / 15 / 15 / 5.6                                  | Fasting    | 7.0           |
|                                                |           |        |              | Olive oil                | 32       | 29.6 (10.3)                   | 100    | 22.9                        | 5.3              | 51 / 8.7 / 20 / 5.8                                 |            |               |
|                                                |           |        |              | Palm olein               | 32       | 29.6 (10.3)                   | 100    | 22.9                        | 5.3              | 49 / 14 / 15 / 6.4                                  |            |               |
| Tierney, 2011 8 European nations[125]          | parallel  | 4      | 98           | High MUFA                | 111      | 54.6 (8.7)                    | 41.4   | 32.4                        | 5.9              | 42 / 10 / 19 / 6.7                                  | Fasting    | 8.5           |
|                                                |           |        |              | High SFA                 | 100      | 54.9 (8.6)                    | 45.0   | 31.8                        | 6.0              | 41 / 18 / 13 / 6.3                                  | IV         |               |
|                                                |           |        |              | Low fat high CHO         | 106      | 54.7 (9.4)                    | 44.3   | 32.5                        | 5.9              | 49 / 8.6 / 12 / 6                                   |            |               |
|                                                |           |        |              | Low fat high CHO n-3 fat | 100      | 55.4 (9.6)                    | 45.0   | 32.4                        | 6.0              | 50 / 8.7 / 11 / 5.7                                 |            |               |
| Bjermo, 2012 Sweden [48]                       | Parallel  | 2      | 70           | Linoleic acid            | 32       | 57 (51-63)                    | 44.0   | 30.3                        | 5.3              | 44 / 10 / 12 / 15                                   | Fasting    | 10.0          |
|                                                |           |        |              | SFA                      | 29       | 56 (50-64)                    | 44.0   | 31.3                        | 5.4              | 43 / 21 / 14 / 4.6                                  |            |               |
| Guay, 2012 Canada [109]                        | Crossover | 2      | 3            | High fat                 | 12       | 27.1 (3.9)                    | 100    | 25.2                        | 5.0              | 50 / 15 / 13 / 4.3                                  | Fasting    | 7.0           |
|                                                |           |        |              | Low fat                  | 12       | 27.1 (3.9)                    | 100    | 25.2                        | 5.0              | 62 / 6 / 12 / 4.9                                   |            |               |
| Haghighatdoost, 2012 Iran [49]                 | Crossover | 2      | 42           | MUFA-rich                | 17       | 34.8 (7.9)                    | 0      | 27.6                        | 4.4              | 52 / 8.5 / 13 / 7.5                                 | Fasting    | 9.5           |
|                                                |           |        |              | SFA-rich diet            | 17       | 34.8 (7.9)                    | 0      | 27.6                        | 4.4              | 50 / 14 / 7 / 11                                    |            |               |
| Wycherley, 2012 Australia[126]                 | Parallel  |        | 84           | CHO diet                 | 34       | 50.2 (9.3)                    | 100    | 33.0                        | 5.8              | 51 / 7.5 / 9.6 / 4.6                                | Fasting    | 9.0           |
|                                                |           |        |              | Protein diet             | 32       | 51.3 (9.4)                    | 100    | 33.0                        | 5.8              | 37 / 8.2 / 11 / 4.6                                 |            |               |
| Kien, 2013 United States [24]**                | Crossover | 2      | 21           | Oleic acid               | 9        | 28.9 (7.6)                    | 100    | 23.4                        | 4.6              | 44 / 3.7 / 29 / 6.6                                 | Fasting    | 7.0           |
|                                                |           |        |              | Palmitic acid            | 9        | 28.9 (7.6)                    | 100    | 23.4                        | 4.6              | 43 / 18 / 16 / 5.1                                  | IV         |               |
|                                                | Crossover | 2      | 21           | Oleic acid               | 9        | 30 (6.6)                      | 0      | 22.8                        | 4.5              | 44 / 3.7 / 29 / 6.6                                 | Fasting    | 7.0           |
|                                                |           |        |              | Palmitic acid            | 9        | 30 (6.6)                      | 0      | 22.8                        | 4.5              | 43 / 18 / 16 / 5.1                                  | IV         |               |
| Young, 2013 United States [94]                 | Crossover | 3      | 56           | High fat                 | 17       | 57 (6.0)                      | 0      | 28.0                        | 6.0              | 45 / 28 / 29 / 28                                   | Fasting    | 8.5           |
|                                                |           |        |              | Low fat                  | 16       | 57 (6.0)                      | 0      | 28.0                        | 6.0              | 65 / 13 / 14 / 13                                   |            |               |
|                                                |           |        |              | Low fat, n-3 PUFA        | 16       | 57 (6.0)                      | 0      | 28.0                        | 5.8              | 62 / 15 / 16 / 16                                   |            |               |
| Chiu, 2014                                     | Parallel  | 5      | 28           | Control diet             | 31       | 38 (12.0)                     | 25.8   | 33.9                        | 5.2              | 55 / 7.3 / 13 / 7.2                                 | Fasting    | 8.5           |

**S1 Table.** Characteristics of 102 randomized controlled feeding trials evaluated in the meta-analysis of effects of diets with different macronutrient compositions on glucose-insulin homeostasis.

| Author, publication year, Location (Reference) | Design    | N arms | Length days* | Dietary arms             | N adults | Mean age (SD or range), years | Men, % | Mean BMI, kg/m <sup>2</sup> | Glucose, mmol/L† | Macronutrient intake CHO/SFA/MUFA/PUFA % of energy‡ | Measures §     | Quality score |
|------------------------------------------------|-----------|--------|--------------|--------------------------|----------|-------------------------------|--------|-----------------------------|------------------|-----------------------------------------------------|----------------|---------------|
| United States [50]                             |           |        |              | High protein, high SFA   | 32       | 38 (12.0)                     | 25.0   | 33.9                        | 5.2              | 35 / 15 / 9.8 / 7.1                                 | IV             |               |
|                                                |           |        |              | High protein, low SFA    | 36       | 38 (12.0)                     | 44.4   | 33.9                        | 5.2              | 35 / 7.4 / 18 / 7.6                                 |                |               |
|                                                |           |        |              | Mod protein, high SFA    | 29       | 38 (12.0)                     | 17.2   | 33.9                        | 5.2              | 35 / 15 / 20 / 7.1                                  |                |               |
|                                                |           |        |              | Mod protein, low SFA     | 30       | 38 (12.0)                     | 33.3   | 33.9                        | 5.2              | 35 / 7.5 / 29 / 7.4                                 |                |               |
| Filippou, 2014<br>Malaysia [100]               | Crossover | 3      | 42           | High oleic sunflower oil | 41       | 29.1 (7.6)                    | 24.4   | 23.0                        | 4.9              | 55 / 4.4 / 17 / 4.1                                 | Fasting<br>OTT | 9.5           |
|                                                |           |        |              | Esterified palm olein    | 41       | 29.1 (7.6)                    | 24.4   | 23.0                        | 4.9              | 55 / 11 / 10 / 3.9                                  |                |               |
|                                                |           |        |              | Palm olein               | 41       | 29.1 (7.6)                    | 24.4   | 23.0                        | 4.9              | 55 / 11 / 11 / 4.1                                  |                |               |
| Iggman, 2014<br>Sweden [51]                    | Parallel  | 2      | 49           | PUFA                     | 19       | 26.5 (4.6)                    | 68.0   | 20.8                        | 4.6              | 43 / 12 / 12 / 13                                   | Fasting        | 10.5          |
|                                                |           |        |              | SFA                      | 20       | 27.4 (3.8)                    | 70.0   | 19.7                        | 4.5              | 48 / 16 / 13 / 4.5                                  |                |               |
| Jordy, 2014<br>Denmark [127]                   | Parallel  | 2      | 3            | High CHO                 | 7        | 25.4 (3.2)                    | 100    | 24.5                        | 5.1              | 80 / 2.8 / 2.3 / 5.9                                | Fasting        | 4.0           |
|                                                |           |        |              | High fat                 | 11       | 23.8 (3.0)                    | 100    | 22.8                        | 5.0              | 10 / 12 / 47 / 18                                   |                |               |
| Marina, 2014<br>United States [128]            | Crossover | 2      | 28           | High fat                 | 7        | 36 (2.9)                      | 76.9   | 33.6                        | 5.3              | 47 / 12 / 17 / 4.7                                  | Fasting        | 7.5           |
|                                                |           |        |              | Low fat                  | 7        | 36 (2.9)                      | 76.9   | 33.6                        | 5.3              | 62 / 7.7 / 7.7 / 3                                  |                |               |
| Rietman, 2014<br>Netherlands [129]             | Crossover | 2      | 14           | High protein             | 9        | 22.8 (0.7)                    | 19.0   | 21.5                        | 5.2              | 37 / 12 / 12 / 12                                   | Fasting        | 7.5           |
|                                                |           |        |              | Normal protein           | 8        | 22.8 (0.7)                    | 19.0   | 21.5                        | 5.2              | 45 / 12 / 14 / 12                                   |                |               |
| Sacks, 2014<br>United States [26]**            | Crossover | 2      | 35           | High CHO, low GI         | 153      | 53 (11.0)                     | 48.0   | 32.0                        | 5.4              | 57 / 6 / 13 / 8                                     | Fasting<br>OTT | 10.0          |
|                                                |           |        |              | Low CHO, low GI          | 153      | 53 (11.0)                     | 48.0   | 32.0                        | 5.4              | 40 / 7 / 19 / 10                                    |                |               |
|                                                |           |        |              | High CHO, high GI        | 150      | 53 (11.0)                     | 48.0   | 32.0                        | 5.4              | 58 / 6 / 12 / 7                                     |                |               |
|                                                |           |        |              | Low CHO, high GI         | 151      | 53 (11.0)                     | 48.0   | 32.0                        | 5.4              | 41 / 7 / 18 / 10                                    |                |               |
| Rozati, 2015<br>United States [101]            | Parallel  | 2      | 90           | Control diet             | 21       | 72 (4.6)                      | 29.0   | 29.0                        | 5.7              | 43 / 13 / 13 / 13                                   | Fasting        | 8.5           |
|                                                |           |        |              | Olive oil                | 20       | 72 (4.5)                      | 40.0   | 29.0                        | 5.6              | 43 / 11 / 20 / 6.6                                  |                |               |
| Vafeiadou, 2015<br>United Kingdom [96]         | Parallel  | 3      | 112          | MUFA                     | 64       | 43 (8.0)                      | 42.2   | 26.3                        | 5.0              | 49 / 8.1 / 19 / 5.7                                 | Fasting        | 9.0           |
|                                                |           |        |              | PUFA                     | 65       | 45 (8.1)                      | 43.9   | 27.0                        | 5.0              | 49 / 8 / 12 / 11                                    |                |               |
|                                                |           |        |              | SFA                      | 65       | 45 (8.1)                      | 44.6   | 26.7                        | 5.1              | 48 / 18 / 11 / 3.9                                  |                |               |
| Baril-Gravel, 2015<br>Canada [52]              | Crossover | 5      | 28           | Canola + n-3 PUFA        | 130      | 46.5 (14.2)                   | 46.2   | 29.8                        | 5.4              | 50 / 6.0 / 10 / 16                                  | Fasting        | 10.0          |
|                                                |           |        |              | Corn + safflower oil     | 130      | 46.5 (14.2)                   | 46.2   | 29.8                        | 5.4              | 50 / 6.8 / 9.6 / 16                                 |                |               |
|                                                |           |        |              | Canola                   | 130      | 46.5 (14.2)                   | 46.2   | 29.8                        | 5.4              | 50 / 6.6 / 18 / 9.1                                 |                |               |
|                                                |           |        |              | Flax + safflower oil     | 130      | 46.5 (14.2)                   | 46.2   | 29.8                        | 5.4              | 50 / 6.5 / 19 / 6.9                                 |                |               |
|                                                |           |        |              | Canola + oleic acid      | 130      | 46.5 (14.2)                   | 46.2   | 29.8                        | 5.4              | 50 / 6.9 / 18 / 8.0                                 |                |               |
| <b>Trials of adults with diabetes</b>          |           |        |              |                          |          |                               |        |                             |                  |                                                     |                |               |
| Garg, 1988<br>United States [130]              | Crossover | 2      | 28           | High MUFA                | 10       | 56 (6.3)                      | 100    | 29.0                        | 7.2              | 35 / 10 / 33 / 7                                    | Fasting        | 7.5           |
|                                                |           |        |              | High CHO                 | 10       | 56 (6.3)                      | 100    | 29.0                        | 7.2              | 60 / 9 / 9 / 6                                      |                |               |
| Coulston, 1989<br>United States [55]           | Crossover | 2      | 42           | High CHO                 | 8        | 66 (50-73)                    | 62.5   | 25.5                        | 10.5             | 40 / 12 / 17 / 12                                   | Fasting        | 6.0           |
|                                                |           |        |              | Low fat                  | 8        | 66 (50-73)                    | 62.5   | 25.5                        | 10.5             | 60 / 5.7 / 8.1 / 6.2                                |                |               |
| Fuh, 1990<br>Taiwan [57]                       | Crossover | 2      | 15           | High CHO                 | 11       | 58 (49-64)                    | 100    | 25.8                        | 7.9              | 60 / 5.2 / 7.5 / 7.3                                | Fasting        | 6.0           |
|                                                |           |        |              | High fat                 | 11       | 58 (49-64)                    | 100    | 25.8                        | 7.6              | 40 / 10 / 15 / 15                                   |                |               |
| Garg, 1992<br>United States [61]               | Crossover | 2      | 21           | High CHO                 | 8        | 63 (6.0)                      | 100    | 30.0                        | 6.4              | 60 / 8 / 12 / 5                                     | Fasting<br>OTT | 6.5           |
|                                                |           |        |              | Low CHO                  | 8        | 63 (6.0)                      | 100    | 30.0                        | 6.1              | 35 / 11 / 32 / 7                                    |                |               |
| Vessby, 1992<br>Sweden [84]                    | Crossover | 2      | 21           | PUFA                     | 14       | 63 (39-86)                    | 33.3   | 26.1                        | 11.9             | 56 / 8.5 / 10 / 12                                  | Fasting        | 5.5           |
|                                                |           |        |              | SFA                      | 14       | 63 (39-86)                    | 33.3   | 26.1                        | 11.9             | 56 / 16 / 10 / 5.1                                  |                |               |

**S1 Table.** Characteristics of 102 randomized controlled feeding trials evaluated in the meta-analysis of effects of diets with different macronutrient compositions on glucose-insulin homeostasis.

| Author, publication year, Location (Reference) | Design    | N arms | Length days* | Dietary arms                             | N adults       | Mean age (SD or range), years          | Men, %               | Mean BMI, kg/m <sup>2</sup> | Glucose, mmol/L†  | Macronutrient intake CHO/SFA/MUFA/PUFA % of energy‡            | Measures §     | Quality score |
|------------------------------------------------|-----------|--------|--------------|------------------------------------------|----------------|----------------------------------------|----------------------|-----------------------------|-------------------|----------------------------------------------------------------|----------------|---------------|
| Garg, 1992<br>United States [131]              | Crossover | 2      | 28           | High MUFA<br>High CHO                    | 10<br>10       | 61.5 (4.0)<br>61.5 (4.0)               | 100<br>100           | 27.7<br>27.7                | 7.2<br>6.6        | 38 / 5 / 31 / 10<br>65 / 3 / 11 / 6                            | Fasting        | 8.5           |
| Parillo, 1992<br>Italy [89]                    | Crossover | 2      | 15           | High MUFA, low CHO<br>Low MUFA, high CHO | 10<br>10       | 52.7 (8.4)<br>52.7 (8.4)               | 70.0<br>70.0         | 26.7<br>26.7                | 6.6<br>6.6        | 40 / 7 / 29 / 4<br>60 / 5 / 13 / 2                             | Fasting        | 7.5           |
| Rasmussen, 1993<br>Denmark [67]                | Crossover | 2      | 21           | High MUFA<br>High CHO                    | 15<br>15       | 57 (7.7)<br>57 (7.7)                   | 66.7<br>66.7         | 27.0<br>27.0                | 8.4<br>8.4        | 36 / 10 / 30 / 7<br>49 / 11 / 11 / 7                           | Fasting<br>OTT | 7.5           |
| Lerman-Garber, 1994<br>Mexico [102]            | Crossover | 2      | 28           | High MUFA<br>High CHO                    | 14<br>14       | 56 (8.0)<br>56 (8.0)                   | 0<br>0               | 28.0<br>28.0                | 6.5<br>7.2        | 40 / 11 / 24 / 5<br>60 / 6.6 / 6.6 / 6.6                       | Fasting        | 5.0           |
| Garg, 1994<br>United States [88]               | Crossover | 2      | 42           | High MUFA<br>High CHO                    | 42<br>42       | 58 (10.0)<br>58 (10.0)                 | 78.6<br>78.6         | 28.1<br>28.1                | 8.3<br>8.3        | 40 / 10 / 25 / 10<br>55 / 10 / 10 / 10                         | Fasting        | 6.5           |
| Walker, 1995<br>Australia [82]                 | Crossover | 2      | 90           | High CHO, low fat<br>Modified fat        | 24<br>24       | 58.3 (2.1)<br>58.3 (2.1)               | 37.5<br>37.5         | 29.2<br>29.2                | 8.5<br>9.6        | 50 / 9 / 10 / 4<br>40 / 11 / 20 / 5                            | Fasting        | 5.5           |
| Lerman-Garber, 1995<br>Mexico [83]             | Crossover | 2      | 42           | High MUFA<br>High CHO                    | 8<br>5         | 60 (7.0)<br>60 (7.0)                   | 0<br>0               | 25.2<br>25.2                | 11.7<br>12.4      | 40 / 11 / 24 / 5<br>60 / 6.6 / 6.6 / 6.6                       | Fasting        | 7.0           |
| Thomsen, 1995<br>Denmark [63]                  | Crossover | 2      | 21           | MUFA<br>PUFA                             | 16<br>16       | 59 (2.0)<br>59 (2.0)                   | 62.5<br>62.5         | 28.0<br>28.0                | 8.2<br>8.4        | 37 / 10 / 30 / 7<br>36 / 9 / 10 / 27                           | Fasting        | 7.0           |
| Katsilambros, 1996<br>Greece [104]             | Crossover | 2      | 120          | Olive oil<br>Sunflower oil               | 7<br>6         | 54.5 (7.4)<br>54.5 (7.4)               | 84.6<br>84.6         | 28.2<br>28.2                | 8.7<br>9.1        | 45 / 11 / 20 / 4<br>45 / 11 / 8 / 16                           | Fasting        | 6.5           |
| Christiansen, 1997<br>Denmark [115]            | Crossover | 3      | 42           | Cis-MUFA<br>SFA<br>Trans-MUFA            | 16<br>16<br>16 | 55 (12.0)<br>55 (12.0)<br>55 (12.0)    | 56.3<br>56.3<br>56.3 | 32.8<br>32.5<br>32.7        | 9.0<br>9.0<br>9.0 | 50 / 5 / 20 / 5<br>50 / 20 / 2.5 / 5<br>50 / 5 / 0 / 5         | Fasting        | 6.5           |
| Storm, 1997<br>Denmark [132]                   | Crossover | 3      | 21           | CHO<br>Palmitic acid<br>Stearic acid     | 15<br>15<br>15 | 53 (9.0)<br>53 (9.0)<br>53 (9.0)       | 53.3<br>53.3<br>53.3 | 29.7<br>29.7<br>29.7        | 7.7<br>7.8<br>7.9 | 51 / 9 / 11 / 5<br>40 / 21 / 16 / 6<br>40 / 19 / 17 / 6        | Fasting        | 7.0           |
| Georgopoulos, 1998<br>United States [35]       | Crossover | 2      | 28           | High MUFA<br>High CHO                    | 17<br>17       | 32.2 (5.4)<br>32.2 (5.4)               | 52.9<br>52.9         | 23.5<br>23.5                | 8.4<br>9.3        | 45 / 9 / 25 / 6<br>61 / 9 / 9 / 6                              | Fasting        | 5.5           |
| Brynes, 2000<br>United Kingdom [60]            | Crossover | 2      | 21           | High MUFA<br>High PUFA                   | 9<br>9         | 56 (5.3)<br>56 (5.3)                   | 55.6<br>55.6         | 29.8<br>29.8                | 8.0<br>7.9        | 47 / 8 / 20 / 4.2<br>47 / 9.2 / 12 / 13                        | Fasting<br>OTT | 7.5           |
| Shige, 2000<br>Australia [65]                  | Parallel  | 3      | 84           | High MUFA<br>High SFA<br>High CHO        | 13<br>10<br>12 | 58.7 (2.5)<br>58.9 (3.0)<br>57.5 (3.4) | 15.4<br>30.0<br>25.0 | 33.6<br>33.3<br>32.6        | 8.1<br>7.4<br>8.6 | 50 / 6.8 / 15 / 9<br>52 / 17 / 9.9 / 2.1<br>73 / 3.5 / 3 / 2.1 | Fasting<br>OTT | 7.5           |
| Higashi, 2001<br>Japan [103]                   | Crossover | 2      | 21           | Linoleic acid<br>Oleic acid              | 8<br>8         | 62 (6.9)<br>62 (6.9)                   | 25.0<br>25.0         | 24.7<br>24.7                | 9.4<br>9.4        | 58 / 5 / 5 / 15<br>58 / 5 / 15 / 5                             | Fasting        | 6.0           |
| Lovejoy, 2002<br>United States [25]**          | Crossover | 2      | 28           | High fat, almond<br>Low fat, almond      | 30<br>30       | 53.8 (10.4)<br>53.8 (10.4)             | 43.3<br>43.3         | 33.0<br>33.0                | 8.1<br>8.7        | 46 / 6.8 / 23 / 11<br>58 / 4.8 / 16 / 7.7                      | Fasting<br>OTT | 8.5           |
|                                                | Crossover | 2      | 28           | High fat<br>Low fat                      | 30<br>30       | 53.8 (10.4)<br>53.8 (10.4)             | 43.3<br>43.3         | 33.0<br>33.0                | 8.6<br>8.0        | 49 / 7.4 / 21 / 8.7<br>60 / 5.3 / 15 / 6.5                     | Fasting<br>OTT | 8.5           |
| Rodriguez-Villar, 2003<br>Spain [90]           | Crossover | 2      | 14           | CHO diet<br>MUFA diet                    | 22<br>22       | 61 (7.0)<br>61 (7.0)                   | 54.5<br>54.5         | 28.3<br>28.3                | 9.0<br>9.0        | 52 / 6.4 / 14 / 4.3<br>41 / 7.3 / 25 / 5                       | Fasting        | 8.0           |
| Gannon, 2004<br>United States [41]             | Crossover | 2      | 35           | Control<br>LoBAG                         | 8<br>8         | 63.3 (51-82)<br>63.3 (51-82)           | 100<br>100           | 31.0<br>31.0                | 10.0<br>9.3       | 55 / 11 / 9.3 / 7.7<br>20 / 9.6 / 20 / 11                      | Fasting        | 7.5           |

**S1 Table.** Characteristics of 102 randomized controlled feeding trials evaluated in the meta-analysis of effects of diets with different macronutrient compositions on glucose-insulin homeostasis.

| Author, publication year, Location (Reference) | Design    | N arms | Length days* | Dietary arms                                    | N adults       | Mean age (SD or range), years          | Men, %               | Mean BMI, kg/m <sup>2</sup> | Glucose, mmol/L†  | Macronutrient intake CHO/SFA/MUFA/PUFA % of energy‡             | Measures §     | Quality score |
|------------------------------------------------|-----------|--------|--------------|-------------------------------------------------|----------------|----------------------------------------|----------------------|-----------------------------|-------------------|-----------------------------------------------------------------|----------------|---------------|
| Miyashita, 2004 Japan [133]                    | Parallel  | 2      | 28           | High CHO<br>Low CHO                             | 11<br>11       | 52.4 (13.0)<br>52.4 (13.0)             | 72.7<br>72.7         | 27.0<br>27.0                | 11.1<br>11.5      | 62 / 3 / 4 / 3<br>39 / 11 / 14 / 11                             | Fasting        | 4.0           |
| Papakonstantinou, 2010 Greece [134]            | Crossover | 2      | 28           | High prot low fat<br>Low prot high fat          | 17<br>17       | 46 (3.0)<br>46 (3.0)                   | 29.4<br>29.4         | 33.0<br>34.0                | 7.1<br>7.5        | 50 / 6.3 / 9.1 / 3.4<br>50 / 6.7 / 21 / 5                       | Fasting<br>OTT | 10.0          |
| Taylor, 2010 Canada [135]                      | Parallel  | 3      | 84           | Control diet<br>Flaxseed oil<br>Milled flaxseed | 9<br>12<br>13  | 52.4 (1.5)<br>52.4 (1.5)<br>52.4 (1.5) | 50.0<br>50.0<br>50.0 | 32.4<br>32.4<br>32.4        | 7.7<br>6.9<br>6.6 | 45 / 14 / 15 / 5.3<br>46 / 11 / 12 / 7.1<br>48 / 12 / 13 / 8.7  | Fasting        | 8.0           |
| Gannon, 2011 United States [45]                | Crossover | 2      | 35           | Control<br>LoBAG                                | 8<br>8         | 61 (5.9)<br>61 (5.9)                   | 100<br>100           | 31.0<br>31.0                | 8.2<br>8.4        | 55 / 10 / 10 / 10<br>29 / 11 / 17 / 9                           | Fasting        | 6.5           |
| Jenkins, 2011 Canada [136]                     | Parallel  | 3      | 90           | Half dose<br>Muffins<br>Nuts                    | 38<br>39<br>40 | 62 (8.0)<br>61 (10.0)<br>63 (9.0)      | 68.0<br>67.0<br>65.0 | 30.0<br>29.0<br>29.0        | 7.4<br>7.1<br>7.3 | 41 / 10 / 16 / 9.3<br>44 / 11 / 11 / 9.2<br>39 / 9.4 / 19 / 9.2 | Fasting        | 9.5           |
| Li, 2011 Taiwan [93]                           | Crossover | 2      | 28           | Almond<br>Control                               | 20<br>20       | 58 (2.0)<br>58 (2.0)                   | 45.0<br>45.0         | 26.0<br>26.0                | 8.7<br>8.7        | 47 / 6.1 / 17 / 11<br>57 / 6.1 / 8.1 / 9.4                      | Fasting        | 8.0           |
| Helge, 2012 Denmark [99]                       | Crossover | 2      | 21           | CHO rich<br>Fat rich                            | 11<br>11       | 58.7 (7.0)<br>58.7 (7.0)               | 100<br>100           | 28.1<br>28.1                | 7.5<br>7.5        | 59 / 28 / 21 / 9.5<br>22 / 25 / 19 / 15                         | Fasting        | 6.5           |
| Tay, 2015 Australia [95]                       | Parallel  | 2      | 84           | High CHO<br>Low CHO                             | 37<br>41       | 58 (7.0)<br>58 (7.0)                   | 51.0<br>64.0         | 35.1<br>34.2                | 8.4<br>7.8        | 51 / 7.2 / 11 / 4.1<br>13 / 9.8 / 31 / 12                       | Fasting        | 10.0          |

The reference list is in S3 Text. Abbreviations: BMI, body mass index; CHO, carbohydrates; DHA, docosahexaenoic acid; EPA, eicosapentaenoic acid; GI, glycaemic index; LoBAG, Low biologically available glucose diet; MUFA, monounsaturated fatty acids; PHSO, partially hydrogenated soybean oil; OTT, oral tolerance test; PUFA, polyunsaturated fatty acids; SFA, saturated fatty acids.

\* Duration of an intervention.

† Baseline measures of fasting glucose. Keogh et al (2005) did not report baseline glucose values [120] and was imputed. The uncertain of imputation was accounted for by undertaking multiple imputation using ten imputed datasets (S3 Text).

‡ All trials performed interventions of meals with caloric contents similar across arms (isocaloric intervention). Protein consumption (% energy) can be approximated by calculating 100 minus % energy from CHO, SFA, MUFA, plus PUFA.

§ Outcome measures varied across trials. Fasting indicates availability of any of the fasting blood measures (fasting glucose, fasting insulin, haemoglobin A1c, C-peptide, and homeostasis model assessment for insulin resistance); OTT, 2-hour glucose and 2-hour insulin from oral-glucose or oral-meal tolerance test; and IV, insulin sensitivity index or acute insulin response derived from IV assays.

|| The quality score was based on 11-point Jadad Scale [137]. Eleven components reflect different aspects of reporting quality: study objectives, inclusion/exclusion criteria, control definition, sample size/power calculation, randomisation, blinding, drop-out, outcome definition, exposure definition, assessment of adverse events, and statistical methods. Two reviewers independently assigned scores of these eleven components to each trial, average scores for the components were calculated and summed up (Table S2 for details). Inter-rater correlation for the total score was 0.61, consistent with that observed by Jadad et al. The most common reasons for lower scores were absence of information on adverse outcomes (% reported=13%); justification of sample size (22.6%); and blinding (34.5%).

\*\* The publication reported estimates stratified by demographics (sex or race) or estimates which included non-comparable arms (e.g. low fat + high GI and high fat + low GI by Sacks et al. 2014 [26]). The number of trial was counted as one, but only comparable arms were pooled in meta-analysis (e.g. comparison between low fat + high GI and high fat + high GI and comparison between low fat + low GI and high fat + low GI). Lovejoy et al. [23] reported results for intravenous measures stratified by race (African American and White) and non-stratified results for fasting glucose and fasting insulin.
