# Supplementary material for: Effects of Saturated Fat, Polyunsaturated Fat, Monounsaturated Fat, and Carbohydrate on Glucose-Insulin Homeostasis: A Systematic Review and Meta-analysis of Randomised Controlled Feeding Trials
Source: PubMed Central journal article supplement (PMC4951141; doi:10.1371/journal.pmed.1002087), 2016-07-19
Supplement: pmed.1002087.s004.pdf [file pmed.1002087.s004.pdf]

**S2 Table.** Characteristics and scores of reporting quality of 102 trials eligible for the meta-analysis of randomized controlled feeding trials of macronutrient intakes and glycaemic outcomes.

| Author of trial, year     | Ward | Weight loss (caloric restriction) | Blinding intervention /outcome measures* | Sources of food composition † | Compliance assessment ‡                 | Food provided, % of energy or text §      | Drop out % | Assessment of quality |          |          |                  |                    |                      |             |                     |                |                 |                     |     |
|---------------------------|------|-----------------------------------|------------------------------------------|-------------------------------|-----------------------------------------|-------------------------------------------|------------|-----------------------|----------|----------|------------------|--------------------|----------------------|-------------|---------------------|----------------|-----------------|---------------------|-----|
|                           |      |                                   |                                          |                               |                                         |                                           |            | Randomisation         | Blinding | Drop out | Study objectives | Outcome definition | Eligibility criteria | Sample size | Exposure definition | Control arm(s) | Adverse effects | Statistical methods |     |
| Hwalla, 2004 [86]         | no   | yes                               | no/no                                    | Database                      | DR, Counselling                         | 100                                       | 6.3        | 1.0                   | 0.0      | 0.5      | 1.0              | 1.0                | 1.0                  | 1.0         | 0.0                 | 1.0            | 1.0             | 0.0                 | 1.0 |
| Johnston, 2004 [58]       | no   | yes                               | no/no                                    | Database                      | Counselling                             | 100                                       | 20.0       | 1.0                   | 0.0      | 1.0      | 1.0              | 1.0                | 1.0                  | 0.5         | 0.0                 | 1.0            | 1.0             | 0.0                 | 1.0 |
| Clifton, 2004 [119]       | no   | yes                               | no/no                                    | Database                      | 3d DR, Counselling                      | Key fat sources, breakfast cereals, bread | 11.4       | 1.0                   | 0.0      | 1.0      | 1.0              | 1.0                | 1.0                  | 1.0         | 0.0                 | 1.0            | 1.0             | 0.0                 | 1.0 |
| Noakes, 2005 [78]         | no   | yes                               | no/no                                    | Database                      | 3d DR, Urine N, minerals, vitamins      | 60                                        | 15.8       | 1.0                   | 0.0      | 1.0      | 1.0              | 1.0                | 1.0                  | 1.0         | 0.0                 | 1.0            | 1.0             | 0.0                 | 1.0 |
| Luscombe-Marsh, 2005 [77] | no   | yes                               | no/no                                    | Database                      | Urine N, Counselling                    | 60                                        | 20.6       | 1.0                   | 0.0      | 1.0      | 1.0              | 1.0                | 1.0                  | 1.0         | 0.5                 | 1.0            | 1.0             | 0.0                 | 1.0 |
| Keogh, 2005 [120]         | no   | no                                | no/no                                    | Database                      | 3d DR                                   | 85.5                                      | 20.0       | 1.0                   | 0.0      | 1.0      | 1.0              | 1.0                | 1.0                  | 1.0         | 0.0                 | 1.0            | 1.0             | 0.0                 | 1.0 |
| Schutte, 2006 [121]       | no   | no                                | no/no                                    | Meal                          | Leftover, FD                            | 100                                       | 8.8        | 1.0                   | 0.0      | 0.5      | 1.0              | 1.0                | 1.0                  | 1.0         | 1.0                 | 1.0            | 1.0             | 0.0                 | 1.0 |
| Noakes, 2006 [34]         | no   | yes                               | no/no                                    | Database                      | 3d DR                                   | 36                                        | 19.3       | 1.0                   | 0.5      | 1.0      | 0.5              | 1.0                | 0.5                  | 0.5         | 1.0                 | 1.0            | 0.5             | 1.0                 |     |
| Vega-Lopez, 2006 [107]    | no   | no                                | yes/yes                                  | Meal                          | NR                                      | 100                                       | N/A        | 1.0                   | 1.0      | 0.0      | 1.0              | 1.0                | 1.0                  | 1.0         | 0.0                 | 1.0            | 1.0             | 0.0                 | 1.0 |
| Tholstrup, 2006 [97]      | no   | no                                | no/no                                    | Fat                           | 4d DR, TG FA, CE FA, PL FA              | 60                                        | N/A        | 1.0                   | 1.0      | 0.0      | 1.0              | 1.0                | 0.5                  | 0.5         | 1.0                 | 1.0            | 0.0             | 1.0                 |     |
| Johnston, 2006 [120]      | no   | yes                               | no/no                                    | Database                      | PL FA                                   | 100                                       | 5.0        | 1.0                   | 0.5      | 1.0      | 1.0              | 1.0                | 0.0                  | 0.5         | 1.0                 | 1.0            | 0.5             | 1.0                 |     |
| Tricon, 2006 [37]         | no   | no                                | yes/yes                                  | Database                      | 3d DR, LDL FA                           | 12.1                                      | 3.1        | 1.0                   | 1.0      | 1.0      | 1.0              | 1.0                | 1.0                  | 0.0         | 1.0                 | 1.0            | 0.0             | 1.0                 |     |
| Berglund, 2007 [105]      | no   | no                                | no/no                                    | Meal                          | Counselling                             | 85.7                                      | 22.7       | 1.0                   | 1.0      | 0.5      | 1.0              | 1.0                | 1.0                  | 0.0         | 1.0                 | 1.0            | 0.0             | 1.0                 |     |
| St-Onge, 2007 [38]        | no   | no                                | no/no                                    | Database                      | Counselling                             | 100                                       | 26.7       | 1.0                   | 0.0      | 1.0      | 1.0              | 1.0                | 1.0                  | 0.0         | 1.0                 | 1.0            | 0.0             | 1.0                 |     |
| Sundram, 2007 [33]        | no   | no                                | no/no                                    | Fat, protein                  | TG FA                                   | 100                                       | 6.3        | 1.0                   | 1.0      | 1.0      | 1.0              | 1.0                | 1.0                  | 0.0         | 1.0                 | 1.0            | 0.0             | 1.0                 |     |
| Paniagua, 2007 [108]      | no   | no                                | no/no                                    | Database                      | 3d DR, Plasma FA                        | 100                                       | 3.0        | 1.0                   | 0.0      | 1.0      | 1.0              | 1.0                | 1.0                  | 0.5         | 1.0                 | 1.0            | 0.0             | 1.0                 |     |
| Egert, 2008 [106]         | no   | no                                | no/no                                    | Fat                           | FD, LDL FA                              | 100                                       | 21.3       | 1.0                   | 0.5      | 0.5      | 1.0              | 1.0                | 1.0                  | 0.0         | 0.5                 | 1.0            | 0.5             | 1.0                 |     |
| Mensink, 2008 [85]        | no   | no                                | no/yes                                   | Fat                           | PL FA                                   | 15                                        | 0          | 1.0                   | 1.0      | 1.0      | 1.0              | 1.0                | 1.0                  | 1.0         | 1.0                 | 1.0            | 0.0             | 1.0                 |     |
| Tay, 2008 [122]           | no   | yes                               | no/no                                    | Database                      | 3d DR                                   | 30                                        | 19.3       | 1.0                   | 0.0      | 1.0      | 1.0              | 1.0                | 1.0                  | 0.0         | 1.0                 | 1.0            | 0.0             | 1.0                 |     |
| Vega-Lopez, 2009 [113]    | no   | no                                | no/no                                    | Meal                          | N/A                                     | 100                                       | 18.9       | 0.5                   | 1.0      | 0.0      | 1.0              | 1.0                | 1.0                  | 0.0         | 1.0                 | 1.0            | 0.0             | 1.0                 |     |
| Bradley, 2009 [62]        | no   | yes                               | no/no                                    | Database                      | Counselling, Urine N                    | 100                                       | 11.1       | 1.0                   | 0.5      | 0.0      | 1.0              | 0.5                | 1.0                  | 1.0         | 1.0                 | 1.0            | 0.0             | 1.0                 |     |
| Tardy, 2009 [30]          | no   | no                                | yes/yes                                  | Fat                           | 5d DR, PL FA                            | Key foods                                 | 7.9        | 1.0                   | 1.0      | 1.0      | 1.0              | 1.0                | 1.0                  | 0.5         | 1.0                 | 1.0            | 0.0             | 1.0                 |     |
| Forsythe, 2010 [114]      | no   | no                                | no/no                                    | Database                      | Leftover, Counselling, TG FA, PL FA, CE | 100                                       | N/A        | 1.0                   | 0.0      | 0.0      | 1.0              | 1.0                | 1.0                  | 0.0         | 1.0                 | 0.5            | 0.0             | 1.0                 |     |

**S2 Table.** Characteristics and scores of reporting quality of 102 trials eligible for the meta-analysis of randomized controlled feeding trials of macronutrient intakes and glycaemic outcomes.

| Author of trial, year     | Ward | Weight loss (caloric restriction) | Blinding intervention /outcome measures* | Sources of food composition † | Compliance assessment ‡               | Food provided, % of energy or text § | Drop out % | Assessment of quality |          |          |                  |                    |                      |             |                     |                |                 |                     |     |     |
|---------------------------|------|-----------------------------------|------------------------------------------|-------------------------------|---------------------------------------|--------------------------------------|------------|-----------------------|----------|----------|------------------|--------------------|----------------------|-------------|---------------------|----------------|-----------------|---------------------|-----|-----|
|                           |      |                                   |                                          |                               |                                       |                                      |            | Randomisation         | Blinding | Drop out | Study objectives | Outcome definition | Eligibility criteria | Sample size | Exposure definition | Control arm(s) | Adverse effects | Statistical methods |     |     |
| Jebb, 2010 [27]           | no   | no                                | no/no                                    | Meal, fat, database           | FA<br>FD,<br>PL FA                    | Key sources of fat and carbohydrates | 27.1       | 1.0                   | 0.0      | 1.0      | 1.0              | 1.0                | 1.0                  | 1.0         | 0.0                 | 1.0            | 1.0             | 0.0                 | 1.0 |     |
| Bos, 2010 [123]           | no   | no                                | no/no                                    | Meal                          | FD,<br>adipocyte FA                   | 90                                   | 5.1        | 1.0                   | 0.0      | 1.0      | 1.0              | 1.0                | 1.0                  | 1.0         | 1.0                 | 1.0            | 1.0             | 0.5                 | 1.0 |     |
| Yeung, 2010 [47]          | no   | no                                | no/no                                    | Database                      | Counselling                           | 100                                  | 15.7       | 1.0                   | 0.0      | 0.5      | 1.0              | 0.5                | 1.0                  | 0.5         | 1.0                 | 1.0            | 0.5             | 1.0                 | 0.5 | 1.0 |
| Johnstone, 2011 [92]      | no   | yes                               | no/no                                    | Database                      | FD                                    | 100                                  | 11.1       | 1.0                   | 0.0      | 0.5      | 1.0              | 1.0                | 1.0                  | 0.0         | 1.0                 | 1.0            | 0.0             | 1.0                 | 0.0 | 0.5 |
| Iggman, 2011 [40]         | no   | no                                | no/no                                    | Fat                           | CE FA, PL FA                          | 100                                  | NR         | 1.0                   | 0.5      | 0.5      | 1.0              | 1.0                | 1.0                  | 0.0         | 1.0                 | 1.0            | 0.0             | 1.0                 | 0.0 | 1.0 |
| Hjerpsted, 2011 [98]      | no   | no                                | no/no                                    | Database                      | 3d DR                                 | 13                                   | 7.5        | 1.0                   | 0.0      | 0.0      | 1.0              | 1.0                | 1.0                  | 0.0         | 0.5                 | 1.0            | 0.0             | 0.5                 | 1.0 |     |
| Tholstrup, 2011 [124]     | no   | no                                | no/no                                    | Fat                           | 3d DR                                 | 17                                   | 4.4        | 1.0                   | 1.0      | 0.0      | 1.0              | 1.0                | 1.0                  | 0.0         | 0.5                 | 1.0            | 0.0             | 0.5                 | 1.0 |     |
| Goree, 2011 [46]          | no   | no                                | no/no                                    | Database                      | N/A                                   | 100                                  | 9.2        | 0.0                   | 0.5      | 0.5      | 1.0              | 1.0                | 1.0                  | 0.0         | 1.0                 | 1.0            | 0.0             | 1.0                 | 0.0 | 1.0 |
| Tierney, 2011[125]        | no   | no                                | no/yes                                   | Database                      | 3d FD, Plasma<br>FA                   | 72.2                                 | 14.2       | 1.0                   | 0.0      | 0.5      | 1.0              | 1.0                | 1.0                  | 1.0         | 1.0                 | 1.0            | 1.0             | 0.0                 | 1.0 |     |
| Bendsen, 2011 [91]        | no   | no                                | yes/yes                                  | Database                      | 3d DR, PL FA,<br>RBC FA               | 31.2                                 | 5.7        | 1.0                   | 1.0      | 0.0      | 1.0              | 1.0                | 1.0                  | 1.0         | 1.0                 | 1.0            | 1.0             | 0.0                 | 1.0 |     |
| Haghighatdoost, 2012 [49] | no   | yes                               | no/yes                                   | Database                      | 1d DR                                 | High-fat dairy, butter, red meat     | 34.6       | 1.0                   | 0.5      | 1.0      | 1.0              | 1.0                | 1.0                  | 0.5         | 1.0                 | 1.0            | 0.5             | 1.0                 |     |     |
| Guay, 2012 [109]          | no   | no                                | yes/yes                                  | Database                      | N/A                                   | 100                                  | N/A        | 1.0                   | 0.5      | 0.0      | 1.0              | 1.0                | 1.0                  | 0.0         | 0.5                 | 1.0            | 0.0             | 1.0                 |     |     |
| Bjermo, 2012 [48]         | no   | no                                | no/yes                                   | Database                      | CE FA                                 | 50                                   | 4.7        | 1.0                   | 0.0      | 1.0      | 1.0              | 1.0                | 1.0                  | 1.0         | 1.0                 | 1.0            | 1.0             | 1.0                 |     |     |
| Wycherley, 2012 [126]     | no   | yes                               | no/no                                    | Database                      | 3d DR                                 | 60                                   | 8.4        | 1.0                   | 0        | 1.0      | 1.0              | 1.0                | 1.0                  | 1.0         | 1.0                 | 1.0            | 0.0             | 1.0                 |     |     |
| Kien, 2013 [24]           | no   | no                                | yes/yes                                  | Database                      | Muscle FA,<br>Blood FA,<br>Monitoring | 100                                  | 25.0       | 0.5                   | 0.0      | 0.5      | 1.0              | 1.0                | 1.0                  | 0.5         | 1.0                 | 1.0            | 0.0             | 0.0                 |     |     |
| Young, 2013 [94]          | no   | no                                | no/no                                    | Database                      | PL FA                                 | 100                                  | 29.2       | 1.0                   | 0.0      | 1.0      | 1.0              | 1.0                | 1.0                  | 0.0         | 1.0                 | 1.0            | 0.5             | 1.0                 |     |     |
| Rietman, 2014             | no   | no                                | no/no                                    | Meal                          | Urine N, FD,<br>Leftover              | 100                                  | 6.9        | 1.0                   | 0.5      | 0.5      | 1.0              | 1.0                | 0.0                  | 0.5         | 1.0                 | 1.0            | 0.0             | 1.0                 |     |     |
| Iggman, 2014 [51]         | no   | no                                | yes/yes                                  | Fat                           | CE FA, 4d DR                          | 7.65                                 | 0          | 1.0                   | 1.0      | 1.0      | 1.0              | 1.0                | 1.0                  | 1.0         | 1.0                 | 1.0            | 0.5             | 1.0                 |     |     |
| Jordy, 2014 [127]         | no   | no                                | no/no                                    | N/A                           | N/A                                   | 50                                   | N/A        | 1.0                   | 0.0      | 0.0      | 1.0              | 1.0                | 0.0                  | 0.0         | 1.0                 | 0.0            | 0.0             |                     |     |     |
| Marina, 2014 [128]        | no   | no                                | no/no                                    | Database                      | Checklist                             | 100                                  | 46.2       | 1.0                   | 0.0      | 0.0      | 1.0              | 1.0                | 1.0                  | 0.0         | 1.0                 | 1.0            | 0.5             | 1.0                 |     |     |
| Sacks, 2014 [26]          | no   | no                                | no/yes                                   | Database                      | Urine N,<br>Leftover,<br>Monitoring   | 100                                  | 5.9        | 1.0                   | 0.0      | 1.0      | 1.0              | 1.0                | 1.0                  | 1.0         | 1.0                 | 1.0            | 1.0             | 1.0                 |     |     |
| Filippou, 2014 [100]      | no   | no                                | yes/yes                                  | Fat                           | Lipids                                | 71.4                                 | 29.3       | 1.0                   | 0.5      | 1.0      | 1.0              | 1.0                | 1.0                  | 1.0         | 1.0                 | 0.5            | 0.5             | 1.0                 |     |     |
| Chiu, 2014 [50]           | no   | no                                | no/no                                    | N/A                           | Counselling                           | 66.0                                 | 9.2        | 1.0                   | 0.0      | 1.0      | 1.0              | 1.0                | 1.0                  | 0.5         | 0.5                 | 1.0            | 0.5             | 1.0                 |     |     |
| Baril-Gravel, 2015 [52]   | no   | no                                | no/yes                                   | Fat                           | Serum lipids                          | 100                                  | 19.2       | 1.0                   | 1.0      | 1.0      | 1.0              | 1.0                | 1.0                  | 1.0         | 1.0                 | 1.0            | 0.0             | 1.0                 |     |     |
| Vafeiadou, 2015 [96]      | no   | no                                | no/no                                    | Meal                          | PL FA, 4d FR                          | 26.6                                 | 6.9        | 1.0                   | 0.0      | 1.0      | 1.0              | 1.0                | 1.0                  | 1.0         | 1.0                 | 1.0            | 0.0             | 1.0                 |     |     |

**S2 Table.** Characteristics and scores of reporting quality of 102 trials eligible for the meta-analysis of randomized controlled feeding trials of macronutrient intakes and glycaemic outcomes.

| Author of trial, year                         | Ward | Weight loss (caloric restriction) | Blinding intervention /outcome measures* | Sources of food composition † | Compliance assessment ‡ | Food provided, % of energy or text §                                      | Drop out % | Randomisation | Blinding | Drop out | Assessment of quality |                    |                      |             |                     |                |                 |                     |
|-----------------------------------------------|------|-----------------------------------|------------------------------------------|-------------------------------|-------------------------|---------------------------------------------------------------------------|------------|---------------|----------|----------|-----------------------|--------------------|----------------------|-------------|---------------------|----------------|-----------------|---------------------|
|                                               |      |                                   |                                          |                               |                         |                                                                           |            |               |          |          | Study objectives      | Outcome definition | Eligibility criteria | Sample size | Exposure definition | Control arm(s) | Adverse effects | Statistical methods |
| Rozati, 2015 [101]                            | no   | no                                | no/yes                                   | Fat                           | Counselling, Plasma FA  | 17.1                                                                      | 6.8        | 1.0           | 0.5      | 1.0      | 1.0                   | 1.0                | 1.0                  | 0.0         | 1.0                 | 1.0            | 0.0             | 1.0                 |
| <b>Trials recruiting adults with diabetes</b> |      |                                   |                                          |                               |                         |                                                                           |            |               |          |          |                       |                    |                      |             |                     |                |                 |                     |
| Garg, 1988 [130]                              | yes  | no                                | no/no                                    | Fat                           | TG FA, CE FA            | 100                                                                       | 0          | 1.0           | 0.0      | 1.0      | 1.0                   | 1.0                | 0.5                  | 0.0         | 1.0                 | 1.0            | 0.0             | 1.0                 |
| Coulston, 1989 [55]                           | no   | no                                | no/no                                    | Database                      | N/A                     | 100                                                                       | 0          | 1.0           | 0.0      | 0.5      | 1.0                   | 1.0                | 0.0                  | 0.0         | 0.5                 | 1.0            | 0.0             | 1.0                 |
| Fuh, 1990 [57]                                | no   | no                                | no/no                                    | Database                      | N/A                     | 100                                                                       | N/A        | 1.0           | 0.0      | 0.0      | 1.0                   | 1.0                | 0.0                  | 0.0         | 1.0                 | 1.0            | 0.0             | 1.0                 |
| Vessby, 1992 [84]                             | yes  | no                                | no/no                                    | Fat                           | PL FA                   | 100                                                                       | 6.7        | 0.0           | 0.0      | 1.0      | 1.0                   | 1.0                | 0.5                  | 0.0         | 0.5                 | 1.0            | 0.0             | 0.5                 |
| Parillo, 1992 [89]                            | yes  | no                                | no/no                                    | Database                      | N/A                     | 100                                                                       | 0          | 1.0           | 0.5      | 0.5      | 1.0                   | 1.0                | 0.5                  | 0.0         | 1.0                 | 1.0            | 0.0             | 1.0                 |
| Garg, 1992 [61]                               | yes  | no                                | no/no                                    | Database                      | N/A                     | 100                                                                       | N/A        | 1.0           | 0.0      | 0.0      | 1.0                   | 1.0                | 0.5                  | 0.0         | 1.0                 | 1.0            | 0.0             | 1.0                 |
| Garg, 1992 [131]                              | yes  | no                                | no/no                                    | Database                      | N/A                     | 100                                                                       | 0          | 1.0           | 0.0      | 1.0      | 1.0                   | 1.0                | 1.0                  | 0.0         | 1.0                 | 1.0            | 0.5             | 1.0                 |
| Rasmussen, 1993 [67]                          | no   | no                                | no/no                                    | Database                      | 3d DR                   | Key caloric foods                                                         | 0          | 1.0           | 0.0      | 0.5      | 1.0                   | 1.0                | 1.0                  | 0.0         | 1.0                 | 1.0            | 0.0             | 1.0                 |
| Garg, 1994 [88]                               | no   | no                                | no/no                                    | Database                      | N/A                     | 100                                                                       | 0          | 1.0           | 0.0      | 0.5      | 1.0                   | 1.0                | 0.0                  | 0.0         | 1.0                 | 1.0            | 0.0             | 1.0                 |
| Lerman-Garber, 1994 [102]                     | no   | no                                | no/no                                    | Database                      | 24hR                    | 100                                                                       | 25.0       | 1.0           | 0.0      | 1.0      | 1.0                   | 0.5                | 0.0                  | 0.0         | 0.5                 | 1.0            | 0.0             | 0.0                 |
| Walker, 1995 [82]                             | no   | no                                | no/no                                    | Database                      | Counselling             | Olive oil                                                                 | N/A        | 1.0           | 0.0      | 0.0      | 1.0                   | 0.5                | 0.0                  | 0.0         | 1.0                 | 1.0            | 0.0             | 1.0                 |
| Thomsen, 1995 [63]                            | no   | no                                | no/no                                    | Database                      | 3d DR                   | Oils, rolls, meat dishes                                                  | N/A        | 1.0           | 0.0      | 0.5      | 1.0                   | 1.0                | 0.5                  | 0.0         | 1.0                 | 1.0            | 0.0             | 1.0                 |
| Lerman-Garber, 1995 [83]                      | no   | no                                | no/no                                    | Database                      | 7d DR, Counselling      | 100                                                                       | 35.0       | 1.0           | 0.0      | 1.0      | 1.0                   | 1.0                | 1.0                  | 0.0         | 1.0                 | 1.0            | 0.0             | 0.0                 |
| Katsilambros, 1996 [104]                      | no   | no                                | no/no                                    | Database                      | Counselling             | oil only                                                                  | N/A        | 1.0           | 0.0      | 0.0      | 0.5                   | 1.0                | 0.5                  | 0.5         | 1.0                 | 1.0            | 0.0             | 1.0                 |
| Storm, 1997 [132]                             | no   | no                                | no/no                                    | Fat                           | 7d DR, TG FA            | 62                                                                        | 0          | 1.0           | 0.0      | 0.5      | 1.0                   | 1.0                | 0.5                  | 0.0         | 1.0                 | 1.0            | 0.0             | 1.0                 |
| Christiansen, 1997 [115]                      | no   | no                                | no/no                                    | Database                      | Counselling             | key foods                                                                 | N/A        | 1.0           | 0.0      | 0.0      | 1.0                   | 1.0                | 1.0                  | 0.0         | 1.0                 | 1.0            | 0.0             | 0.5                 |
| Georgopoulos, 1998 [35]                       | no   | no                                | no/no                                    | Database                      | N/A                     | 100                                                                       | N/A        | 1.0           | 0.0      | 0.0      | 0.5                   | 1.0                | 0.0                  | 0.0         | 1.0                 | 1.0            | 0.5             | 0.5                 |
| Brynes, 2000 [60]                             | no   | no                                | yes/yes                                  | Database                      | TG FA                   | Carrot cake                                                               | N/A        | 0.5           | 1.0      | 0.5      | 1.0                   | 1.0                | 0.0                  | 0.5         | 1.0                 | 1.0            | 0.0             | 1.0                 |
| Shige, 2000 [65]                              | no   | yes                               | no/no                                    | Database                      | 3d DR                   | Key caloric foods, wheat bran, breakfast cereal, and low-fat frozen meals | 16.7       | 1.0           | 0.0      | 1.0      | 1.0                   | 1.0                | 0.5                  | 0.0         | 1.0                 | 1.0            | 0.0             | 1.0                 |
| Higashi, 2001 [103]                           | yes  | no                                | no/no                                    | Database                      | N/A                     | 100                                                                       | 0          | 1.0           | 0.0      | 0.0      | 1.0                   | 1.0                | 0.0                  | 0.0         | 1.0                 | 1.0            | 0.0             | 1.0                 |
| Lovejoy, 2002 [25]                            | no   | no                                | no/no                                    | Meal                          | FD                      | 100                                                                       | 11.8       | 1.0           | 0.5      | 1.0      | 1.0                   | 1.0                | 1.0                  | 0.0         | 1.0                 | 1.0            | 0.0             | 1.0                 |
| Rodriguez-Villar, 2003                        | no   | no                                | no/no                                    | Database                      | 3d DR                   | 25                                                                        | 15.4       | 1.0           | 0.0      | 1.0      | 1.0                   | 1.0                | 1.0                  | 1.0         | 0.0                 | 1.0            | 0.0             | 1.0                 |

**S2 Table.** Characteristics and scores of reporting quality of 102 trials eligible for the meta-analysis of randomized controlled feeding trials of macronutrient intakes and glycaemic outcomes.

| Author of trial, year        | Ward | Weight loss (caloric restriction) | Blinding intervention /outcome measures* | Sources of food composition † | Compliance assessment ‡ | Food provided, % of energy or text § | Drop out % | Randomisation | Blinding | Drop out | Assessment of quality |                    |                      |             |                     |                |                 |                     |  |
|------------------------------|------|-----------------------------------|------------------------------------------|-------------------------------|-------------------------|--------------------------------------|------------|---------------|----------|----------|-----------------------|--------------------|----------------------|-------------|---------------------|----------------|-----------------|---------------------|--|
|                              |      |                                   |                                          |                               |                         |                                      |            |               |          |          | Study objectives      | Outcome definition | Eligibility criteria | Sample size | Exposure definition | Control arm(s) | Adverse effects | Statistical methods |  |
| [90]                         |      |                                   |                                          |                               |                         |                                      |            |               |          |          |                       |                    |                      |             |                     |                |                 |                     |  |
| Gannon, 2004 [41]            | no   | no                                | no/no                                    | Database                      | Urine N, Counselling    | 100                                  | 27.3       | 1.0           | 0.0      | 1.0      | 1.0                   | 1.0                | 0.5                  | 0.0         | 1.0                 | 1.0            | 0.0             | 1.0                 |  |
| Miyashita, 2004 [133]        | yes  | yes                               | no/no                                    | Database                      | N/A                     | 100                                  | N/A        | 0.0           | 0.0      | 0.0      | 1.0                   | 1.0                | 0.0                  | 0.0         | 1.0                 | 1.0            | 0.0             | 0.0                 |  |
| Papakonstantinou, 2010 [134] | no   | yes                               | no/no                                    | Database                      | DR                      | 26                                   | N/A        | 1.0           | 1.0      | 0.5      | 1.0                   | 1.0                | 1.0                  | 1.0         | 1.0                 | 1.0            | 1.0             | 1.0                 |  |
| Taylor, 2010 [135]           | no   | no                                | no/no                                    | Database                      | 3d DR, 24hR, PL FA      | Bakery products                      | N/A        | 1.0           | 0.0      | 0.0      | 1.0                   | 1.0                | 1.0                  | 1.0         | 1.0                 | 1.0            | 0.0             | 1.0                 |  |
| Li, 2011 [93]                | no   | no                                | no/no                                    | Database                      | FD                      | 100                                  | 9.1        | 1.0           | 0.0      | 1.0      | 1.0                   | 1.0                | 1.0                  | 0.0         | 1.0                 | 1.0            | 0.0             | 1.0                 |  |
| Jenkins, 2011 [136]          | no   | no                                | no/no                                    | Database                      | 7d DR                   | Nuts, muffins                        | 12.1       | 1.0           | 0.0      | 1.0      | 1.0                   | 1.0                | 1.0                  | 1.0         | 1.0                 | 1.0            | 0.5             | 1.0                 |  |
| Gannon, 2011 [45]            | no   | no                                | no/no                                    | Database                      | FD                      | 100                                  | N/A        | 1.0           | 0.0      | 0.0      | 1.0                   | 1.0                | 0.5                  | 0.0         | 1.0                 | 1.0            | 0.0             | 1.0                 |  |
| Helge, 2012 [99]             | no   | no                                | no/no                                    | Database                      | N/A                     | 100                                  | N/A        | 1.0           | 0.5      | 0.0      | 1.0                   | 1.0                | 0.0                  | 0.0         | 1.0                 | 1.0            | 0.0             | 1.0                 |  |
| Tay, 2015 [95]               | no   | yes                               | no/yes                                   | Database                      | 7d DR, OH-B             | Key foods                            | 33.1       | 1.0           | 0.0      | 1.0      | 1.0                   | 1.0                | 1.0                  | 1.0         | 1.0                 | 1.0            | 1.0             | 1.0                 |  |

The reference list is in S3 Text. Abbreviations: N/A, not available in the publication in which there was no information on those who did not complete follow-up; DR, dietary records; FA, fatty acid; FD, food diary; 24hR, 24-hour dietary recall; CE, cholesteryl ester; PL, phospholipid; RBC, red blood cell; TG, triglyceride; Urine N, urinary nitrogen.

\* Trials that reported interventions to achieve blinding, for example, testing two fat spreads made of different types of vegetable oils (e.g. palm oil and rapeseed oil), in which study participants were unlikely to be aware of difference in experimental diets. Of outcome assessments, "no" was assigned for trials that did not report any information on blinding of outcome measurements.

† Database indicates amount of nutrients consumed were calculated by using nutrient database. The others indicate that authors determined macronutrient compositions (meals) or fat composition (fat), or protein contents (protein) by conducting a laboratory assay of test meals.

‡ Assessment of compliance to each dietary intervention. Blank indicates no information was available. Counselling includes assessment of compliance by interview and by use of dietary questionnaires. Each of protein and FA indicates that trials performed urine assay to relate urinary nitrogen to protein intake and FA assays to relate circulating FA levels to FA intake. "Leftover" indicates that the investigators collected leftovers or packages of meals provided and confirmed compliance to the meal intervention.

§ Values represent % of energy provided by the study group to each participant (>0 to 100 because we included only feeding trials). If not available, text description of trial intervention is provided.

|| Each of the eleven components was scored as 0 or 1 by two independent reviewers and averaged to be 0, 0.5 or 1.0. The sum of the eleven scores, specified by Jadad et al, was considered as a measure of study quality.[138] The inter-rater correlation was 0.61, consistent with the observation by Jadad et al. The presentation follows the recommendation by Cochrane Collaboration.[139]
