# Supplementary material for: Effects of Saturated Fat, Polyunsaturated Fat, Monounsaturated Fat, and Carbohydrate on Glucose-Insulin Homeostasis: A Systematic Review and Meta-analysis of Randomised Controlled Feeding Trials
Source: PubMed Central journal article supplement (PMC4951141; doi:10.1371/journal.pmed.1002087), 2016-07-19
Supplement: pmed.1002087.s005.pdf [file pmed.1002087.s005.pdf]

**S3 Table.** Effects of isocalorically exchanging 5% of dietary energy between carbohydrates and major types of fatty acids on glucose-insulin metrics, with stratification by country, age, sex, diabetes status, provision of meals, and blinding in randomised controlled feeding trials.\*

| Outcome         | Strata of trials*     | N trials | Effects (95% confidence interval) of isocaloric replacement of 5% dietary energy |                      |                      |                      |                      |                      |
|-----------------|-----------------------|----------|----------------------------------------------------------------------------------|----------------------|----------------------|----------------------|----------------------|----------------------|
|                 |                       |          | CHO<br>→SFA                                                                      | CHO<br>→MUFA         | CHO<br>→PUFA         | SFA<br>→MUFA         | SFA<br>→PUFA         | MUFA<br>→PUFA        |
| Glucose, mmol/L |                       |          |                                                                                  |                      |                      |                      |                      |                      |
| All             |                       | 99       | 0.02 (-0.01, 0.04)                                                               | 0.00 (-0.02, 0.02)   | -0.02 (-0.05, 0.01)  | -0.02 (-0.04, 0.00)  | -0.04 (-0.07, -0.01) | -0.02 (-0.05, 0.01)  |
| Region          | US/Canada             | 33       | 0.03 (-0.01, 0.08)                                                               | 0.02 (-0.03, 0.06)   | -0.03 (-0.06, 0.01)  | -0.02 (-0.05, 0.02)  | -0.06 (-0.11, -0.01) | -0.04 (-0.10, 0.02)  |
|                 | Europe                | 56       | 0.00 (-0.04, 0.04)                                                               | 0.00 (-0.03, 0.02)   | -0.03 (-0.08, 0.01)  | -0.01 (-0.05, 0.04)  | -0.04 (-0.08, 0.00)  | -0.03 (-0.09, 0.03)  |
|                 | Asia                  | 7        | -0.13 (-0.32, 0.05)                                                              | -0.17 (-0.31, -0.02) | 0.14 (-0.14, 0.41)   | -0.03 (-0.11, 0.05)  | 0.27 (-0.11, 0.66)   | 0.30 (-0.02, 0.62)   |
| Age             | ≥52 years             | 58       | 0.01 (-0.03, 0.05)                                                               | -0.04 (-0.08, -0.01) | -0.08 (-0.12, -0.04) | -0.05 (-0.10, 0.00)  | -0.09 (-0.13, -0.04) | -0.04 (-0.09, 0.02)  |
|                 | <52 years             | 41       | 0.04 (0.01, 0.07)                                                                | 0.02 (0.00, 0.05)†   | 0.02 (-0.03, 0.06)†  | -0.02 (-0.04, 0.01)  | -0.02 (-0.07, 0.03)  | -0.01 (-0.06, 0.04)  |
| Sex             | Men                   | 49       | -0.01 (-0.07, 0.04)                                                              | -0.04 (-0.06, -0.01) | -0.08 (-0.13, -0.03) | -0.02 (-0.07, 0.03)  | -0.06 (-0.11, -0.01) | -0.04 (-0.09, 0.01)  |
|                 | Women                 | 50       | 0.03 (0.01, 0.05)                                                                | 0.01 (-0.01, 0.04)†  | 0.00 (-0.04, 0.03)   | -0.02 (-0.04, 0.01)  | -0.03 (-0.07, 0.01)  | -0.02 (-0.06, 0.02)  |
| Body mass index | ≥28 kg/m <sup>2</sup> | 47       | 0.04 (0.00, 0.07)                                                                | -0.03 (-0.06, -0.01) | -0.03 (-0.08, 0.02)  | -0.07 (-0.12, -0.02) | -0.07 (-0.12, -0.02) | 0.00 (-0.06, 0.06)   |
|                 | <28 kg/m <sup>2</sup> | 52       | 0.04 (0.00, 0.07)                                                                | 0.03 (0.00, 0.06)†   | 0.01 (-0.04, 0.05)   | -0.01 (-0.04, 0.01)  | -0.03 (-0.07, 0.01)  | -0.02 (-0.07, 0.02)  |
| Diabetes        | Yes                   | 31       | -0.18 (-0.43, 0.08)                                                              | -0.14 (-0.22, -0.06) | -0.32 (-0.50, -0.14) | 0.03 (-0.26, 0.33)   | -0.15 (-0.48, 0.19)  | -0.18 (-0.39, 0.03)  |
|                 | No                    | 68       | 0.03 (0.00, 0.05)                                                                | 0.01 (-0.01, 0.03)†  | -0.01 (-0.04, 0.02)† | -0.02 (-0.04, 0.00)  | -0.04 (-0.07, 0.00)  | -0.02 (-0.05, 0.02)  |
| Providing meals | All                   | 53       | 0.04 (0.00, 0.09)                                                                | -0.02 (-0.05, 0.01)  | 0.01 (-0.02, 0.05)   | -0.07 (-0.10, -0.03) | -0.03 (-0.09, 0.02)  | 0.04 (-0.01, 0.08)   |
|                 | Partial               | 46       | 0.00 (-0.02, 0.03)                                                               | 0.01 (-0.01, 0.03)   | -0.05 (-0.08, -0.02) | 0.01 (-0.01, 0.03)   | -0.05 (-0.08, -0.02) | -0.06 (-0.10, -0.03) |
| Blinding        | Yes                   | 60       | 0.01 (-0.04, 0.05)                                                               | -0.05 (-0.07, -0.02) | -0.06 (-0.13, 0.01)  | -0.05 (-0.10, -0.01) | -0.07 (-0.14, 0.01)  | -0.01 (-0.08, 0.05)  |
|                 | No                    | 39       | 0.07 (0.03, 0.10)                                                                | 0.06 (0.03, 0.10)†   | 0.02 (-0.02, 0.06)   | 0.00 (-0.03, 0.02)   | -0.05 (-0.07, -0.02) | -0.04 (-0.08, 0.00)  |
| HbA1c, %        |                       |          |                                                                                  |                      |                      |                      |                      |                      |
| All             |                       | 23       | 0.03 (-0.02, 0.09)                                                               | -0.09 (-0.12, -0.05) | -0.11 (-0.17, -0.05) | -0.12 (-0.19, -0.05) | -0.15 (-0.23, -0.06) | -0.03 (-0.09, 0.03)  |
| Region          | US/Canada             | 10       | 0.59 (0.21, 0.97)                                                                | -0.10 (-0.20, -0.01) | -0.50 (-0.73, -0.28) | -0.69 (-1.08, -0.31) | -1.09 (-1.46, -0.72) | -0.40 (-0.66, -0.13) |
|                 | Europe                | 12       | 0.04 (-0.04, 0.11)                                                               | -0.05 (-0.10, 0.00)  | -0.07 (-0.22, 0.08)  | -0.09 (-0.15, -0.02) | -0.11 (-0.24, 0.02)† | -0.02 (-0.14, 0.10)  |
|                 | Asia                  | 0        | Not estimated‡                                                                   |                      |                      |                      |                      |                      |
| Age             | ≥52 years             | 18       | 0.01 (-0.05, 0.08)                                                               | -0.10 (-0.16, -0.04) | -0.14 (-0.29, 0.01)  | -0.11 (-0.18, -0.04) | -0.15 (-0.32, 0.01)  | -0.04 (-0.21, 0.12)  |
|                 | <52 years             | 5        | 0.49 (-0.61, 1.59)                                                               | 0.01 (-0.95, 0.98)   | 0.23 (-2.11, 2.58)   | -0.47 (-1.26, 0.31)  | -0.25 (-1.85, 1.34)  | 0.22 (-1.17, 1.61)   |
| Sex             | Men                   | 12       | 0.29 (-0.30, 0.89)                                                               | -0.05 (-0.19, 0.10)  | -0.10 (-0.25, 0.05)  | -0.34 (-0.95, 0.27)  | -0.39 (-0.98, 0.20)  | -0.05 (-0.15, 0.05)  |
|                 | Women                 | 11       | -0.01 (-0.07, 0.04)                                                              | -0.08 (-0.11, -0.04) | -0.07 (-0.14, -0.01) | -0.07 (-0.13, 0.00)  | -0.06 (-0.15, 0.03)  | 0.01 (-0.06, 0.07)   |
| Body mass index | ≥28 kg/m <sup>2</sup> | 12       | 0.01 (-0.04, 0.07)                                                               | -0.10 (-0.14, -0.06) | -0.14 (-0.27, -0.02) | -0.12 (-0.17, -0.06) | -0.16 (-0.32, 0.00)  | -0.04 (-0.19, 0.11)  |
|                 | <28 kg/m <sup>2</sup> | 11       | -0.15 (-0.53, 0.23)                                                              | -0.08 (-0.29, 0.13)  | -0.11 (-0.36, 0.14)  | 0.08 (-0.21, 0.36)   | 0.04 (-0.21, 0.30)   | -0.03 (-0.10, 0.04)  |
| Diabetes        | Yes                   | 18       | -0.11 (-0.29, 0.08)                                                              | -0.16 (-0.25, -0.06) | -0.18 (-0.33, -0.03) | -0.05 (-0.27, 0.17)  | -0.08 (-0.26, 0.11)  | -0.02 (-0.20, 0.15)  |
|                 | No                    | 5        | -0.02 (-0.20, 0.17)                                                              | -0.09 (-0.19, 0.01)  | -0.11 (-0.20, -0.01) | -0.07 (-0.18, 0.03)  | -0.09 (-0.23, 0.05)  | -0.02 (-0.08, 0.04)  |
| Providing meals | All                   | 16       | 0.12 (0.03, 0.20)                                                                | -0.02 (-0.08, 0.03)  | -0.21 (-0.41, -0.02) | -0.14 (-0.20, -0.07) | -0.33 (-0.58, -0.07) | -0.19 (-0.42, 0.04)  |
|                 | Partial               | 7        | -0.06 (-0.29, 0.18)                                                              | -0.15 (-0.34, 0.05)  | -0.19 (-0.42, 0.04)  | -0.09 (-0.35, 0.17)  | -0.13 (-0.38, 0.11)  | -0.04 (-0.15, 0.06)  |
| Blinding        | Yes                   | 16       | 0.00 (-0.06, 0.06)                                                               | -0.10 (-0.15, -0.05) | -0.15 (-0.28, -0.01) | -0.11 (-0.17, -0.04) | -0.15 (-0.32, 0.02)  | -0.04 (-0.21, 0.12)  |
|                 | No                    | 7        | 0.38 (-0.14, 0.90)                                                               | -0.08 (-0.27, 0.10)  | -0.07 (-0.26, 0.12)  | -0.46 (-1.09, 0.16)  | -0.46 (-1.06, 0.15)  | 0.01 (-0.06, 0.08)   |

**S3 Table.** Effects of isocalorically exchanging 5% of dietary energy between carbohydrates and major types of fatty acids on glucose-insulin metrics, with stratification by country, age, sex, diabetes status, provision of meals, and blinding in randomised controlled feeding trials.\*

| Outcome         | Strata of trials*     | N trials | Effects (95% confidence interval) of isocaloric replacement of 5% dietary energy |                      |                      |                     |                      |                      |  |
|-----------------|-----------------------|----------|----------------------------------------------------------------------------------|----------------------|----------------------|---------------------|----------------------|----------------------|--|
|                 |                       |          | CHO<br>→SFA                                                                      | CHO<br>→MUFA         | CHO<br>→PUFA         | SFA<br>→MUFA        | SFA<br>→PUFA         | MUFA<br>→PUFA        |  |
| Insulin, pmol/L |                       |          |                                                                                  |                      |                      |                     |                      |                      |  |
| All             |                       | 90       | -1.12 (-1.72, -0.53)                                                             | 0.05 (-0.26, 0.36)   | -1.60 (-2.77, -0.42) | 1.17 (0.57, 1.78)   | -0.47 (-2.01, 1.07)  | -1.65 (-2.84, -0.45) |  |
| Region          | US/Canada             | 28       | -1.04 (-2.19, 0.10)                                                              | 0.90 (-0.18, 1.98)   | -3.47 (-5.05, -1.90) | 1.94 (1.11, 2.78)   | -2.43 (-4.28, -0.58) | -4.37 (-6.40, -2.35) |  |
|                 | Europe                | 55       | -0.73 (-3.07, 1.62)                                                              | 0.21 (-0.29, 0.71)   | -0.69 (-2.03, 0.64)  | 0.93 (-1.54, 3.41)  | 0.03 (-3.27, 3.34)   | -0.90 (-2.13, 0.33)  |  |
|                 | Asia                  | 7        | -2.94 (-6.38, 0.50)                                                              | -2.59 (-5.08, -0.11) | -6.70 (-12.1, -1.31) | 0.35 (-1.52, 2.22)  | -3.76 (-11.09, 3.57) | -4.11 (-10.42, 2.19) |  |
| Age             | ≥52 years             | 53       | 0.00 (-1.19, 1.19)                                                               | -0.50 (-1.18, 0.18)  | -1.89 (-2.74, -1.04) | -0.50 (-1.95, 0.95) | -1.89 (-3.31, -0.46) | -1.39 (-2.35, -0.43) |  |
|                 | <52 years             | 37       | -1.01 (-1.73, -0.30)                                                             | 0.18 (-0.42, 0.78)   | -0.10 (-4.24, 4.04)  | 1.20 (0.65, 1.74)   | 0.91 (-3.06, 4.89)   | -0.28 (-4.18, 3.62)  |  |
| Sex             | Men                   | 46       | -1.57 (-2.34, -0.80)                                                             | 0.02 (-0.54, 0.57)   | -1.58 (-2.43, -0.73) | 1.59 (0.73, 2.44)   | -0.01 (-1.09, 1.07)  | -1.60 (-2.53, -0.66) |  |
|                 | Women                 | 44       | -0.93 (-1.79, -0.07)                                                             | -0.06 (-0.61, 0.48)  | -1.65 (-3.68, 0.38)  | 0.87 (-0.01, 1.75)  | -0.72 (-3.29, 1.85)  | -1.59 (-3.66, 0.48)  |  |
| Body mass index | ≥28 kg/m <sup>2</sup> | 41       | 0.19 (-1.05, 1.42)                                                               | -0.22 (-1.00, 0.57)  | -1.72 (-2.64, -0.79) | -0.40 (-2.07, 1.26) | -1.90 (-3.47, -0.34) | -1.50 (-2.55, -0.45) |  |
|                 | <28 kg/m <sup>2</sup> | 49       | -1.47 (-2.23, -0.72)                                                             | -0.05 (-0.59, 0.49)  | -1.66 (-3.85, 0.52)  | 1.42 (0.82, 2.03)   | -0.19 (-2.71, 2.33)  | -1.61 (-3.89, 0.67)  |  |
| Diabetes        | Yes                   | 25       | -2.51 (-5.39, 0.37)                                                              | -1.96 (-3.67, -0.26) | -3.33 (-5.37, -1.29) | 0.55 (-2.97, 4.08)  | -0.82 (-4.47, 2.84)  | -1.37 (-2.49, -0.24) |  |
|                 | No                    | 65       | -0.96 (-1.56, -0.36)                                                             | 0.22 (-0.15, 0.59)   | -1.23 (-3.03, 0.57)  | 1.18 (0.63, 1.73)   | -0.27 (-2.39, 1.85)  | -1.45 (-3.33, 0.44)  |  |
| Providing meals | All                   | 52       | -1.36 (-2.25, -0.46)                                                             | 0.53 (-0.21, 1.27)   | -2.51 (-3.88, -1.14) | 1.89 (1.07, 2.71)   | -1.15 (-2.70, 0.40)  | -3.04 (-4.72, -1.36) |  |
|                 | Partial               | 38       | -0.91 (-1.78, -0.05)                                                             | -0.05 (-0.54, 0.43)  | -1.39 (-2.93, 0.14)  | 0.86 (-0.09, 1.82)  | -0.48 (-2.51, 1.55)  | -1.34 (-2.74, 0.06)  |  |
| Blinding        | Yes                   | 52       | -0.34 (-1.66, 0.98)                                                              | -0.14 (-0.58, 0.30)  | -1.52 (-2.80, -0.24) | 0.21 (-1.12, 1.53)  | -1.18 (-3.05, 0.69)  | -1.39 (-2.65, -0.12) |  |
|                 | No                    | 38       | -1.50 (-2.36, -0.63)                                                             | -0.14 (-0.92, 0.65)  | -1.96 (-3.49, -0.44) | 1.36 (0.68, 2.04)   | -0.47 (-2.32, 1.39)  | -1.83 (-3.38, -0.28) |  |
| HOMA, %change   |                       |          |                                                                                  |                      |                      |                     |                      |                      |  |
| All             |                       | 30       | 0.7 (-1.6, 3.1)                                                                  | -2.4 (-4.6, -0.3)    | -3.4 (-5.9, -0.8)    | -3.1 (-5.8, -0.4)   | -4.1 (-6.4, -1.6)    | -1.0 (-4.4, 2.6)     |  |
| Region          | US/Canada             | 8        | 0.0 (-3.6, 3.7)                                                                  | 1.0 (-5.6, 8.2)      | -4.9 (-8.6, -1.0)    | 1.1 (-7.8, 10.7)    | -4.8 (-7.5, -2.2)    | -5.8 (-14.7, 3.9)    |  |
|                 | Europe                | 18       | 3.1 (-3.0, 9.5)                                                                  | -3.4 (-8.3, 1.8)     | 1.7 (-6.1, 10.0)     | -6.3 (-10.5, -1.8)  | -1.4 (-9.6, 7.7)     | 5.2 (-4.5, 15.9)     |  |
|                 | Asia                  | 4        | Not estimated‡                                                                   |                      |                      |                     |                      |                      |  |
| Age             | ≥52 years             | 17       | 1.4 (-1.2, 4.2)                                                                  | -3.0 (-5.7, -0.2)    | -4.1 (-6.9, -1.1)    | -4.4 (-8.2, -0.4)   | -5.4 (-8.1, -2.7)    | -1.1 (-5.7, 3.7)     |  |
|                 | <52 years             | 13       | -1.5 (-11.2, 9.3)                                                                | -4.3 (-12.7, 4.8)    | 1.6 (-8.7, 13.1)     | -2.9 (-7.8, 2.2)    | 3.2 (-2.7, 9.4)      | 6.2 (-1.8, 14.9)     |  |
| Sex             | Men                   | 13       | -4.0 (-9.2, 1.5)                                                                 | -4.9 (-11.4, 2.1)    | -6.8 (-12.2, -1.1)   | -0.9 (-10.9, 10.2)  | -2.9 (-6.3, 0.6)     | -2.0 (-12.5, 9.8)    |  |
|                 | Women                 | 17       | 2.3 (-0.5, 5.3)                                                                  | -1.9 (-4.5, 0.8)     | -2.8 (-6.2, 0.7)     | -4.1 (-7.3, -0.9)   | -5.0 (-8.5, -1.5)    | -0.9 (-5.3, 3.6)     |  |
| Body mass index | ≥28 kg/m <sup>2</sup> | 15       | 1.4 (-1.3, 4.2)                                                                  | -2.7 (-5.7, 0.4)     | -3.2 (-6.4, 0.0)     | -4.1 (-8.3, 0.3)    | -4.6 (-7.6, -1.5)    | -0.5 (-5.7, 4.9)     |  |
|                 | <28 kg/m <sup>2</sup> | 15       | -3.4 (-10.7, 4.6)                                                                | -5.2 (-10.9, 0.8)    | -6.3 (-13.0, 1.0)    | -1.9 (-6.9, 3.3)    | -3.0 (-6.9, 1.1)     | -1.1 (-6.8, 4.9)     |  |
| Diabetes        | Yes                   | 6        | Not estimated‡                                                                   |                      |                      |                     |                      |                      |  |
|                 | No                    | 24       | 2.0 (-0.7, 4.8)                                                                  | -1.3 (-3.9, 1.3)     | -1.9 (-4.7, 1.0)     | -3.3 (-6.5, 0.0)    | -3.9 (-6.3, -1.4)    | -0.6 (-4.6, 3.5)     |  |
| Providing meals | All                   | 15       | 2.6 (-0.2, 5.4)                                                                  | -3.9 (-6.8, -0.8)    | -1.4 (-4.5, 1.7)     | -6.3 (-10.3, -2.1)  | -3.9 (-6.4, -1.3)    | 2.5 (-2.5, 7.8)      |  |
|                 | Partial               | 15       | -1.8 (-8.4, 5.3)                                                                 | -3.4 (-9.6, 3.1)     | -6.2 (-12.9, 1.0)    | -1.7 (-6.4, 3.3)    | -4.5 (-13.8, 5.8)    | -2.9 (-13.1, 8.5)    |  |
| Blinding        | Yes                   | 17       | -1.0 (-4.8, 3.0)                                                                 | -5.6 (-8.7, -2.5)    | -4.8 (-10.4, 1.1)    | -4.7 (-8.7, -0.5)   | -3.9 (-9.1, 1.7)     | 0.9 (-5.8, 8.1)      |  |
|                 | No                    | 13       | 1.0 (-2.3, 4.4)                                                                  | 0.3 (-5.2, 6.2)      | -3.5 (-6.7, -0.2)    | -0.7 (-7.5, 6.6)    | -4.5 (-7.3, -1.7)    | -3.8 (-10.7, 3.6)    |  |

**S3 Table.** Effects of isocalorically exchanging 5% of dietary energy between carbohydrates and major types of fatty acids on glucose-insulin metrics, with stratification by country, age, sex, diabetes status, provision of meals, and blinding in randomised controlled feeding trials.\*

| Outcome                    | Strata of trials*     | N trials | Effects (95% confidence interval) of isocaloric replacement of 5% dietary energy |                      |                     |                      |                      |                     |
|----------------------------|-----------------------|----------|----------------------------------------------------------------------------------|----------------------|---------------------|----------------------|----------------------|---------------------|
|                            |                       |          | CHO<br>→SFA                                                                      | CHO<br>→MUFA         | CHO<br>→PUFA        | SFA<br>→MUFA         | SFA<br>→PUFA         | MUFA<br>→PUFA       |
| <b>2h glucose, mmol/L</b>  |                       |          |                                                                                  |                      |                     |                      |                      |                     |
| All                        |                       | 11       | -0.04 (-0.39, 0.31)                                                              | -0.15 (-0.76, 0.47)  | 0.21 (-0.35, 0.78)  | -0.10 (-0.91, 0.70)  | 0.26 (-0.34, 0.85)   | 0.36 (-0.48, 1.20)  |
| Region                     | US/Canada             | 3        | Not estimated‡                                                                   |                      |                     |                      |                      |                     |
|                            | Europe                | 7        | 0.08 (-0.55, 0.72)                                                               | -0.42 (-0.79, -0.04) | 0.21 (-0.57, 0.99)  | -0.50 (-1.22, 0.22)  | 0.13 (-0.73, 0.98)   | 0.63 (-0.07, 1.33)  |
|                            | Asia                  | 1        | Not estimated‡                                                                   |                      |                     |                      |                      |                     |
| Age                        | ≥52 years             | 7        | 0.12 (-0.43, 0.67)                                                               | 0.13 (-0.33, 0.59)   | 0.26 (-0.55, 1.07)  | 0.01 (-0.76, 0.79)   | 0.14 (-0.74, 1.03)   | 0.13 (-0.70, 0.95)  |
|                            | <52 years             | 4        | Not estimated‡                                                                   |                      |                     |                      |                      |                     |
| Sex                        | Men                   | 6        | 0.02 (-1.05, 1.08)                                                               | 0.16 (-0.36, 0.68)   | 0.17 (-0.84, 1.18)  | 0.14 (-1.24, 1.53)   | 0.15 (-1.31, 1.60)   | 0.00 (-1.05, 1.06)  |
|                            | Women                 | 5        | 0.08 (-0.29, 0.45)                                                               | -0.15 (-1.46, 1.15)  | 0.55 (-0.97, 2.08)  | -0.24 (-1.66, 1.19)  | 0.47 (-1.14, 2.08)   | 0.71 (-1.34, 2.75)  |
| Body mass index            | ≥28 kg/m <sup>2</sup> | 6        | -0.14 (-0.71, 0.43)                                                              | 0.11 (-0.29, 0.51)   | -0.38 (-0.98, 0.22) | 0.25 (-0.59, 1.09)   | -0.24 (-0.93, 0.46)  | -0.49 (-1.35, 0.37) |
|                            | <28 kg/m <sup>2</sup> | 5        | Not estimated‡                                                                   |                      |                     |                      |                      |                     |
| Diabetes                   | Yes                   | 6        | 0.23 (-0.43, 0.88)                                                               | -0.16 (-1.41, 1.10)  | 0.63 (-0.40, 1.67)  | -0.38 (-2.04, 1.28)  | 0.41 (-0.73, 1.54)   | 0.79 (-1.04, 2.63)  |
|                            | No                    | 5        | 0.12 (-1.02, 1.26)                                                               | -0.11 (-2.83, 2.60)  | 0.03 (-1.33, 1.40)  | -0.23 (-1.92, 1.45)  | -0.08 (-2.45, 2.28)  | 0.15 (-3.79, 4.09)  |
| Providing meals            | All                   | 4        | 14.1 (2.0, 26.1)                                                                 | -2.03 (-4.17, 0.11)  | -6.12 (-12.6, 0.38) | -16.1 (-30.2, -2.0)  | -20.2 (-38.6, -1.74) | -4.09 (-8.67, 0.49) |
|                            | Partial               | 7        | -0.01 (-0.50, 0.49)                                                              | -0.19 (-0.93, 0.56)  | 0.15 (-0.57, 0.87)  | -0.18 (-1.27, 0.91)  | 0.16 (-0.60, 0.92)   | 0.34 (-0.71, 1.39)  |
| Blinding                   | Yes                   | 7        | 0.25 (-0.33, 0.83)                                                               | -0.54 (-0.83, -0.25) | 0.21 (-0.42, 0.83)  | -0.79 (-1.49, -0.09) | -0.04 (-0.82, 0.74)  | 0.75 (0.07, 1.43)   |
|                            | No                    | 4        | 0.79 (-0.69, 2.27)                                                               | -2.34 (-4.76, 0.08)  | 26.9 (2.06, 51.8)   | -3.13 (-6.51, 0.25)  | 26.1 (1.78, 50.5)    | 29.3 (2.05, 56.5)   |
| <b>2hr insulin, pmol/L</b> |                       |          |                                                                                  |                      |                     |                      |                      |                     |
| All                        |                       | 11       | 1.91 (-19.3, 23.1)                                                               | -20.3 (-32.2, -8.45) | -24.9 (-53.9, 4.13) | -22.2 (-49.1, 4.58)  | -26.8 (-72.5, 18.9)  | -4.57 (-33.3, 24.2) |
| Region                     | US/Canada             | 3        | Not estimated‡                                                                   |                      |                     |                      |                      |                     |
|                            | Europe                | 8        | 1.60 (-20.2, 23.4)                                                               | -21.2 (-35.6, -6.9)  | -23.7 (-54.7, 7.36) | -22.8 (-52.5, 6.83)  | -25.3 (-72.9, 22.3)  | -2.47 (-32.0, 27.1) |
|                            | Asia                  | 0        | Not estimated‡                                                                   |                      |                     |                      |                      |                     |
| Age                        | ≥52 years             | 7        | -7.85 (-49.3, 33.6)                                                              | -1.84 (-32.2, 28.5)  | 8.76 (-42.7, 60.2)  | 6.01 (-51.7, 63.7)   | 16.6 (-47.7, 80.9)   | 10.6 (-34.4, 55.6)  |
|                            | <52 years             | 4        | Not estimated‡                                                                   |                      |                     |                      |                      |                     |
| Sex                        | Men                   | 4        | Not estimated‡                                                                   |                      |                     |                      |                      |                     |
|                            | Women                 | 7        | 5.04 (-30.9, 41.0)                                                               | -35.5 (-75.6, 4.63)  | 22.7 (-68.2, 113)   | -40.5 (-113, 32.0)   | 17.6 (-56.9, 92.2)   | 58.1 (-69.1, 185)   |
| Body mass index            | ≥28 kg/m <sup>2</sup> | 7        | 0.80 (-20.7, 22.3)                                                               | -13.6 (-33.9, 6.76)  | -22.8 (-54.8, 9.19) | -14.4 (-45.7, 17.0)  | -23.6 (-69.2, 22.1)  | -9.23 (-44.4, 25.9) |
|                            | <28 kg/m <sup>2</sup> | 4        | Not estimated‡                                                                   |                      |                     |                      |                      |                     |
| Diabetes                   | Yes                   | 6        | -3.2 (-42, 36)                                                                   | 7.13 (-58.5, 72.8)   | -0.97 (-59.0, 57.1) | 10.3 (-77.3, 97.9)   | 2.19 (-67.3, 71.7)   | -8.10 (-98.9, 82.7) |
|                            | No                    | 5        | 1.20 (-102, 104)                                                                 | -25.6 (-150, 99.3)   | -21.3 (-123, 80.2)  | -26.8 (-252, 198)    | -22.5 (-107, 62.3)   | 4.24 (-211, 220)    |
| Providing meals            | All                   | 5        | 116 (-67.7, 300)                                                                 | 19.7 (-32.2, 71.6)   | -81.6 (-209, 45.6)  | -96.6 (-253, 59.8)   | -198 (-459, 63.6)    | -101 (-238, 35.1)   |
|                            | Partial               | 6        | -6.8 (-46.6, 32.9)                                                               | -8.36 (-52.4, 35.6)  | -17.5 (-63.4, 28.3) | -1.56 (-54.1, 51.0)  | -10.7 (-63.2, 41.7)  | -9.17 (-50.5, 32.1) |
| Blinding                   | Yes                   | 8        | -2.1 (-23.8, 19.6)                                                               | -23.2 (-37.1, -9.28) | -14.6 (-49.5, 20.4) | -21.1 (-50.8, 8.6)   | -12.5 (-64.2, 39.3)  | 8.62 (-25.6, 42.8)  |
|                            | No                    | 3        | Not estimated‡                                                                   |                      |                     |                      |                      |                     |

**S3 Table.** Effects of isocalorically exchanging 5% of dietary energy between carbohydrates and major types of fatty acids on glucose-insulin metrics, with stratification by country, age, sex, diabetes status, provision of meals, and blinding in randomised controlled feeding trials.\*

| Outcome                                 | Strata of trials*     | N trials | Effects (95% confidence interval) of isocaloric replacement of 5% dietary energy |                     |                     |                     |                     |                     |
|-----------------------------------------|-----------------------|----------|----------------------------------------------------------------------------------|---------------------|---------------------|---------------------|---------------------|---------------------|
|                                         |                       |          | CHO<br>→SFA                                                                      | CHO<br>→MUFA        | CHO<br>→PUFA        | SFA<br>→MUFA        | SFA<br>→PUFA        | MUFA<br>→PUFA       |
| <b>Si, 10<sup>-5</sup>/(pmol/L)/min</b> |                       |          |                                                                                  |                     |                     |                     |                     |                     |
| All                                     |                       | 13       | -0.10 (-0.21, 0.02)                                                              | -0.01 (-0.11, 0.08) | 0.14 (-0.14, 0.43)  | 0.08 (-0.01, 0.17)  | 0.24 (-0.13, 0.61)  | 0.16 (-0.20, 0.52)  |
| Region                                  | US/Canada             | 5        | Not estimated‡                                                                   |                     |                     |                     |                     |                     |
|                                         | Europe                | 8        | 0.00 (-0.21, 0.20)                                                               | -0.14 (-0.38, 0.10) | 0.75 (0.18, 1.32)   | -0.13 (-0.29, 0.03) | 0.75 (0.08, 1.43)   | 0.89 (0.19, 1.58)   |
|                                         | Asia                  | 0        | Not estimated‡                                                                   |                     |                     |                     |                     |                     |
| Age                                     | ≥52 years             | 5        | 0.27 (-0.30, 0.84)                                                               | 0.27 (-0.57, 1.11)  | 0.25 (-0.96, 1.45)  | 0.00 (-0.32, 0.33)  | -0.02 (-1.66, 1.62) | -0.03 (-1.90, 1.85) |
|                                         | <52 years             | 8        | -0.19 (-0.31, -0.07)                                                             | -0.05 (-0.16, 0.05) | 0.27 (-0.01, 0.56)  | 0.13 (0.05, 0.22)   | 0.46 (0.09, 0.83)   | 0.33 (-0.03, 0.68)  |
| Sex                                     | Men                   | 7        | Not estimated‡                                                                   |                     |                     |                     |                     |                     |
|                                         | Women                 | 6        | Not estimated‡                                                                   |                     |                     |                     |                     |                     |
| Body mass index                         | ≥28 kg/m <sup>2</sup> | 7        | 0.14 (-0.01, 0.29)                                                               | 0.12 (-0.02, 0.26)  | 0.19 (-0.41, 0.79)  | -0.02 (-0.16, 0.13) | 0.05 (-0.58, 0.67)  | 0.06 (-0.56, 0.69)  |
|                                         | <28 kg/m <sup>2</sup> | 6        | -0.46 (-0.83, -0.09)                                                             | -0.41 (-0.93, 0.11) | 0.51 (-0.85, 1.87)  | 0.05 (-0.14, 0.24)  | 0.96 (-0.44, 2.37)  | 0.92 (-0.54, 2.38)  |
| Diabetes                                | Yes                   | 0        | Not estimated‡                                                                   |                     |                     |                     |                     |                     |
|                                         | No                    | 13       | -0.10 (-0.21, 0.02)                                                              | -0.01 (-0.11, 0.08) | 0.14 (-0.14, 0.43)  | 0.08 (0.00, 0.17)   | 0.24 (-0.13, 0.61)  | 0.16 (-0.20, 0.52)  |
| Providing meals                         | All                   | 4        | Not estimated‡                                                                   |                     |                     |                     |                     |                     |
|                                         | Partial               | 9        | 0.02 (-0.12, 0.16)                                                               | -0.07 (-0.17, 0.03) | 0.70 (0.14, 1.26)   | -0.09 (-0.22, 0.04) | 0.67 (0.04, 1.31)   | 0.77 (0.15, 1.38)   |
| Blinding                                | Yes                   | 6        | 0.21 (-0.05, 0.46)                                                               | 0.19 (-0.17, 0.56)  | 0.57 (0.05, 1.08)   | -0.01 (-0.22, 0.20) | 0.36 (-0.18, 0.90)  | 0.37 (-0.22, 0.96)  |
|                                         | No                    | 7        | 0.08 (-0.43, 0.58)                                                               | 0.20 (-0.28, 0.68)  | -0.18 (-1.38, 1.01) | 0.12 (0.03, 0.21)   | -0.26 (-1.89, 1.38) | -0.38 (-2.00, 1.25) |
| <b>AIR, pmol/L/min</b>                  |                       |          |                                                                                  |                     |                     |                     |                     |                     |
| All                                     |                       | 10       | -0.02 (-0.11, 0.07)                                                              | -0.03 (-0.07, 0.01) | 0.49 (0.17, 0.80)   | -0.01 (-0.08, 0.06) | 0.51 (0.20, 0.82)   | 0.52 (0.21, 0.82)   |
| Region                                  | US/Canada             | 3        | Not estimated‡                                                                   |                     |                     |                     |                     |                     |
|                                         | Europe                | 7        | -0.05 (-0.41, 0.31)                                                              | 0.01 (-0.26, 0.28)  | 0.70 (0.06, 1.33)   | 0.07 (-0.11, 0.24)  | 0.75 (-0.16, 1.67)  | 0.69 (-0.14, 1.51)  |
|                                         | Asia                  | 0        | Not estimated‡                                                                   |                     |                     |                     |                     |                     |
| Age                                     | ≥52 years             | 4        | Not estimated‡                                                                   |                     |                     |                     |                     |                     |
|                                         | <52 years             | 6        | -0.05 (-0.17, 0.08)                                                              | -0.05 (-0.10, 0.01) | 0.37 (-0.14, 0.87)  | 0.00 (-0.09, 0.09)  | 0.42 (-0.07, 0.90)  | 0.41 (-0.06, 0.89)  |
| Sex                                     | Men                   | 7        | 0.07 (-0.27, 0.41)                                                               | 0.16 (-0.29, 0.61)  | -0.25 (-1.45, 0.94) | 0.09 (-0.06, 0.25)  | -0.32 (-1.72, 1.08) | -0.41 (-1.89, 1.06) |
|                                         | Women                 | 3        | Not estimated‡                                                                   |                     |                     |                     |                     |                     |
| Body mass index                         | ≥28 kg/m <sup>2</sup> | 5        | Not estimated‡                                                                   |                     |                     |                     |                     |                     |
|                                         | <28 kg/m <sup>2</sup> | 5        | Not estimated‡                                                                   |                     |                     |                     |                     |                     |
| Diabetes                                | Yes                   | 0        | Not estimated‡                                                                   |                     |                     |                     |                     |                     |
|                                         | No                    | 10       | -0.02 (-0.11, 0.07)                                                              | -0.03 (-0.07, 0.01) | 0.49 (0.17, 0.80)   | -0.01 (-0.08, 0.06) | 0.51 (0.20, 0.82)   | 0.52 (0.21, 0.82)   |
| Providing meals                         | All                   | 3        | Not estimated‡                                                                   |                     |                     |                     |                     |                     |
|                                         | Partial               | 7        | 0.02 (-0.08, 0.13)                                                               | -0.03 (-0.08, 0.01) | 0.57 (0.14, 1.00)   | -0.06 (-0.15, 0.03) | 0.55 (0.11, 0.98)   | 0.60 (0.18, 1.03)   |
| Blinding                                | Yes                   | 3        | Not estimated‡                                                                   |                     |                     |                     |                     |                     |
|                                         | No                    | 7        | -0.08 (-0.26, 0.10)                                                              | -0.07 (-0.21, 0.07) | 0.40 (-0.27, 1.06)  | 0.01 (-0.08, 0.10)  | 0.48 (-0.25, 1.21)  | 0.47 (-0.26, 1.20)  |

\* Abbreviations: CHO, carbohydrates; SFA, saturated fatty acids; MUFA, monounsaturated fatty acids; PUFA, polyunsaturated fatty acids; IS, insulin sensitivity. Results for C-peptide were not shown, because of too few trials for stratified meta-regression (n trials=6 in total). Values represent the pooled estimated mean change (95% confidence interval) according to isocaloric exchange of two macronutrients with other macronutrient intakes held constant. The models adjusted for factors varying between within-trial arms, including intakes of protein and trans-fat (% energy) and dietary fiber (g/1000 kcal). 1 mg/dL=0.056 mmol/L for glucose; 1  $\mu$ U/mL=6 pmol/L; HbA1 mmol/mol=(HbA1c % - 2.15) $\times$ 10.929. See reference list in the Supplementary Information (S3 Text).

† Significant heterogeneity with  $\alpha=0.05$  level corrected for false-discovery rate inflated by multiple tests for strata and substitution effects.

‡ Not fitted because of a limited number of trials, yielding failure of convergence or unrealistic estimates.
