# Supplementary material for: Effects of Saturated Fat, Polyunsaturated Fat, Monounsaturated Fat, and Carbohydrate on Glucose-Insulin Homeostasis: A Systematic Review and Meta-analysis of Randomised Controlled Feeding Trials
Source: PubMed Central journal article supplement (PMC4951141; doi:10.1371/journal.pmed.1002087), 2016-07-19
Supplement: pmed.1002087.s007.pdf [file pmed.1002087.s007.pdf]

**S5 Table.** Effects of isocalorically exchanging 5% of dietary energy between carbohydrate and major dietary fats on fasting glucose, haemoglobin A1c, and fasting insulin: sensitivity meta-analysis concerning model covariates and study characteristics.\*

| Outcome and consideration                  | CHO<br>→SFA         | CHO<br>→MUFA         | CHO<br>→PUFA         | SFA<br>→MUFA         | SFA<br>→PUFA         | MUFA<br>→PUFA       |
|--------------------------------------------|---------------------|----------------------|----------------------|----------------------|----------------------|---------------------|
| Fasting glucose, mmol/L                    |                     |                      |                      |                      |                      |                     |
| Main estimates†                            | 0.02 (-0.01, 0.04)  | 0.00 (-0.02, 0.02)   | -0.02 (-0.05, 0.01)  | -0.02 (-0.04, 0.00)  | -0.04 (-0.07, -0.01) | -0.02 (-0.05, 0.01) |
| Covariates for adjustment ‡                |                     |                      |                      |                      |                      |                     |
| <i>t</i> FA, fibre                         | 0.02 (0.00, 0.04)   | 0.00 (-0.02, 0.02)   | -0.02 (-0.04, 0.01)  | -0.02 (-0.04, 0.00)  | -0.04 (-0.07, 0.00)  | -0.02 (-0.05, 0.02) |
| Protein, fibre                             | 0.02 (0.00, 0.05)   | 0.00 (-0.02, 0.02)   | -0.01 (-0.04, 0.01)  | -0.02 (-0.04, 0.00)  | -0.04 (-0.07, 0.00)  | -0.02 (-0.05, 0.02) |
| Protein, <i>t</i> FA                       | 0.02 (0.00, 0.04)   | 0.00 (-0.01, 0.02)   | -0.02 (-0.05, 0.01)  | -0.02 (-0.04, 0.00)  | -0.04 (-0.07, -0.01) | -0.02 (-0.05, 0.01) |
| <i>t</i> FA, fibre, protein, total energy‡ | 0.02 (-0.01, 0.04)  | 0.00 (-0.02, 0.02)   | -0.02 (-0.05, 0.01)  | -0.02 (-0.04, 0.00)  | -0.04 (-0.07, -0.01) | -0.02 (-0.05, 0.01) |
| <i>t</i> FA, fibre, protein, Δweight ‡     | 0.02 (0.00, 0.04)   | 0.00 (-0.02, 0.02)   | -0.02 (-0.05, 0.00)  | -0.02 (-0.04, 0.00)  | -0.04 (-0.07, -0.01) | -0.02 (-0.06, 0.01) |
| Imputation of <i>t</i> FA §                |                     |                      |                      |                      |                      |                     |
| Ratio of <i>t</i> FA to MUFA               | 0.02 (0.00, 0.04)   | 0.01 (-0.02, 0.03)   | -0.02 (-0.04, 0.01)  | -0.01 (-0.04, 0.01)  | -0.04 (-0.07, 0.00)  | -0.02 (-0.06, 0.01) |
| Ratio of <i>t</i> FA to PUFA+MUFA          | 0.02 (-0.01, 0.04)  | 0.00 (-0.02, 0.03)   | -0.02 (-0.04, 0.01)  | -0.01 (-0.04, 0.01)  | -0.03 (-0.07, 0.00)  | -0.02 (-0.05, 0.01) |
| Ratio of <i>t</i> FA to total fat          | 0.02 (0.00, 0.04)   | 0.00 (-0.02, 0.02)   | -0.02 (-0.04, 0.01)  | -0.02 (-0.04, 0.00)  | -0.04 (-0.07, -0.01) | -0.02 (-0.05, 0.01) |
| Trial subtypes (N of 99 trials)            |                     |                      |                      |                      |                      |                     |
| Duration, ≥28 days (39)                    | 0.00 (-0.03, 0.02)  | -0.01 (-0.03, 0.02)  | -0.02 (-0.07, 0.03)  | -0.01 (-0.03, 0.01)  | -0.02 (-0.07, 0.04)  | -0.01 (-0.07, 0.05) |
| Caloric restriction trials (18)            | 0.00 (-0.13, 0.13)  | 0.00 (-0.05, 0.05)   | -0.10 (-0.21, 0.02)  | 0.00 (-0.16, 0.16)   | -0.09 (-0.31, 0.12)  | -0.09 (-0.23, 0.04) |
| Aimed at varying SFA (30)                  | 0.04 (-0.01, 0.09)  | 0.02 (-0.02, 0.07)   | 0.00 (-0.06, 0.06)   | -0.02 (-0.07, 0.03)  | -0.04 (-0.08, 0.00)  | -0.02 (-0.09, 0.05) |
| Aimed at varying MUFA (48)                 | -0.02 (-0.06, 0.01) | -0.02 (-0.05, 0.00)  | -0.04 (-0.09, 0.00)  | 0.00 (-0.03, 0.04)   | -0.02 (-0.06, 0.03)  | -0.02 (-0.06, 0.02) |
| Aimed at varying PUFA (29)                 | 0.05 (-0.02, 0.12)  | -0.04 (-0.08, 0.00)  | -0.01 (-0.07, 0.04)  | -0.09 (-0.15, -0.04) | -0.07 (-0.11, -0.02) | 0.02 (-0.02, 0.07)  |
| Haemoglobin A1c, %                         |                     |                      |                      |                      |                      |                     |
| Main estimates†                            | 0.03 (-0.02, 0.09)  | -0.09 (-0.12, -0.05) | -0.11 (-0.17, -0.05) | -0.12 (-0.19, -0.05) | -0.15 (-0.23, -0.06) | -0.03 (-0.09, 0.03) |
| Covariates for adjustment ‡                |                     |                      |                      |                      |                      |                     |
| <i>t</i> FA, fibre                         | 0.07 (0.01, 0.12)   | -0.09 (-0.13, -0.05) | -0.15 (-0.22, -0.09) | -0.16 (-0.22, -0.09) | -0.22 (-0.31, -0.13) | -0.06 (-0.12, 0.00) |
| Protein, fibre                             | 0.04 (-0.02, 0.09)  | -0.07 (-0.11, -0.04) | -0.07 (-0.12, -0.03) | -0.11 (-0.18, -0.04) | -0.11 (-0.18, -0.03) | 0.00 (-0.05, 0.05)  |
| Protein, <i>t</i> FA                       | 0.09 (0.04, 0.13)   | -0.06 (-0.10, -0.02) | -0.10 (-0.16, -0.03) | -0.14 (-0.21, -0.08) | -0.18 (-0.26, -0.10) | -0.04 (-0.10, 0.02) |
| <i>t</i> FA, fibre, protein, total energy‡ | 0.03 (-0.02, 0.09)  | -0.08 (-0.12, -0.05) | -0.11 (-0.19, -0.03) | -0.12 (-0.19, -0.05) | -0.14 (-0.24, -0.05) | -0.03 (-0.10, 0.05) |
| <i>t</i> FA, fibre, protein, Δweight ‡     | 0.07 (0.00, 0.13)   | -0.06 (-0.10, -0.01) | -0.08 (-0.14, -0.02) | -0.12 (-0.20, -0.05) | -0.15 (-0.23, -0.06) | -0.02 (-0.08, 0.04) |
| Imputation of <i>t</i> FA §                |                     |                      |                      |                      |                      |                     |
| Ratio of <i>t</i> FA to MUFA               | 0.04 (-0.02, 0.09)  | -0.08 (-0.12, -0.03) | -0.09 (-0.14, -0.03) | -0.12 (-0.18, -0.05) | -0.12 (-0.21, -0.04) | -0.01 (-0.07, 0.05) |
| Ratio of <i>t</i> FA to PUFA+MUFA          | 0.04 (-0.02, 0.09)  | -0.08 (-0.12, -0.03) | -0.09 (-0.14, -0.04) | -0.11 (-0.18, -0.04) | -0.12 (-0.20, -0.04) | -0.01 (-0.07, 0.05) |
| Ratio of <i>t</i> FA to total fat          | 0.05 (-0.02, 0.11)  | -0.08 (-0.12, -0.04) | -0.09 (-0.14, -0.03) | -0.12 (-0.20, -0.05) | -0.13 (-0.22, -0.04) | -0.01 (-0.06, 0.05) |
| Trial subtypes (N of 23 trials)            |                     |                      |                      |                      |                      |                     |
| Duration, ≥28 days (8)                     | 0.10 (-0.06, 0.25)  | -0.26 (-0.39, -0.12) | 0.14 (-0.13, 0.41)   | -0.35 (-0.59, -0.11) | 0.05 (-0.27, 0.36)   | 0.40 (0.04, 0.76)   |
| Caloric restriction trials (3)             | Not estimable       |                      |                      |                      |                      |                     |
| Aimed at varying SFA (4)                   | Not estimable       |                      |                      |                      |                      |                     |
| Aimed at varying MUFA (14)                 | 0.09 (0.02, 0.17)   | -0.04 (-0.09, 0.02)  | -0.07 (-0.19, 0.05)  | -0.13 (-0.19, -0.07) | -0.16 (-0.28, -0.04) | -0.03 (-0.13, 0.07) |
| Aimed at varying PUFA (8)                  | 0.01 (-0.35, 0.38)  | 0.01 (-0.29, 0.31)   | 0.00 (-0.32, 0.33)   | -0.01 (-0.26, 0.24)  | -0.01 (-0.26, 0.23)  | -0.01 (-0.07, 0.06) |

(Continued)

**S5 Table.** Effects of isocalorically exchanging 5% of dietary energy between carbohydrate and major dietary fats on fasting glucose, haemoglobin A1c, and fasting insulin: sensitivity meta-analysis concerning model covariates and study characteristics.\*

| Outcome and consideration          | CHO<br>→SFA          | CHO<br>→MUFA        | CHO<br>→PUFA         | SFA<br>→MUFA        | SFA<br>→PUFA        | MUFA<br>→PUFA        |
|------------------------------------|----------------------|---------------------|----------------------|---------------------|---------------------|----------------------|
| Fasting insulin, pmol/L            |                      |                     |                      |                     |                     |                      |
| Main estimates†                    | -1.12 (-1.72, -0.53) | 0.05 (-0.26, 0.36)  | -1.60 (-2.77, -0.42) | 1.17 (0.57, 1.78)   | -0.47 (-2.01, 1.07) | -1.65 (-2.84, -0.45) |
| Covariates for adjustment ‡        |                      |                     |                      |                     |                     |                      |
| tFA, fibre                         | -1.14 (-1.73, -0.54) | 0.00 (-0.31, 0.30)  | -1.53 (-2.70, -0.36) | 1.14 (0.54, 1.73)   | -0.39 (-1.92, 1.14) | -1.53 (-2.69, -0.37) |
| Protein, fibre                     | -1.11 (-1.69, -0.52) | 0.06 (-0.23, 0.36)  | -1.56 (-2.66, -0.46) | 1.17 (0.57, 1.77)   | -0.45 (-1.97, 1.07) | -1.62 (-2.79, -0.46) |
| Protein, tFA                       | -1.14 (-1.65, -0.62) | 0.04 (-0.22, 0.31)  | -1.61 (-2.78, -0.44) | 1.18 (0.66, 1.69)   | -0.47 (-1.95, 1.01) | -1.65 (-2.87, -0.43) |
| tFA, fibre, protein, total energy‡ | -1.12 (-1.73, -0.50) | 0.06 (-0.37, 0.48)  | -1.57 (-2.71, -0.43) | 1.17 (0.57, 1.78)   | -0.45 (-1.95, 1.05) | -1.62 (-2.85, -0.40) |
| tFA, fibre, protein, Δweight ‡     | -0.99 (-1.62, -0.36) | 0.11 (-0.34, 0.56)  | -1.18 (-2.56, 0.20)  | 1.09 (0.49, 1.69)   | -0.19 (-1.89, 1.50) | -1.29 (-2.67, 0.10)  |
| Imputation of tFA §                |                      |                     |                      |                     |                     |                      |
| Ratio of tFA to MUFA               | -1.12 (-1.72, -0.52) | 0.10 (-0.24, 0.44)  | -1.61 (-2.73, -0.50) | 1.22 (0.58, 1.86)   | -0.49 (-2.02, 1.03) | -1.72 (-2.92, -0.51) |
| Ratio of tFA to PUFA+MUFA          | -1.12 (-1.71, -0.54) | 0.10 (-0.23, 0.43)  | -1.69 (-2.87, -0.50) | 1.22 (0.62, 1.83)   | -0.56 (-2.15, 1.02) | -1.79 (-3.07, -0.51) |
| Ratio of tFA to total fat          | -1.14 (-1.73, -0.56) | 0.08 (-0.24, 0.40)  | -1.64 (-2.79, -0.49) | 1.22 (0.61, 1.84)   | -0.50 (-2.05, 1.05) | -1.72 (-2.94, -0.51) |
| Trial subtypes (N of 90 trials)    |                      |                     |                      |                     |                     |                      |
| Duration, ≥28 days (35)            | -1.66 (-2.56, -0.76) | -1.05 (-2.20, 0.10) | -1.57 (-3.31, 0.17)  | 0.61 (-0.27, 1.49)  | 0.09 (-1.98, 2.15)  | -0.52 (-2.81, 1.77)  |
| Caloric restriction trials (18)    | 0.23 (-3.83, 4.29)   | -0.22 (-2.52, 2.07) | -1.65 (-5.98, 2.68)  | -0.45 (-6.09, 5.19) | -1.88 (-8.93, 5.18) | -1.43 (-7.00, 4.15)  |
| Aimed at varying SFA (28)          | -1.81 (-3.71, 0.09)  | 0.05 (-1.54, 1.65)  | -2.73 (-4.54, -0.92) | 1.86 (0.77, 2.96)   | -0.92 (-3.48, 1.64) | -2.79 (-5.12, -0.45) |
| Aimed at varying MUFA (40)         | -1.72 (-2.91, -0.52) | 0.07 (-0.78, 0.93)  | -0.86 (-2.11, 0.39)  | 1.79 (0.73, 2.85)   | 0.86 (-0.59, 2.30)  | -0.93 (-2.00, 0.13)  |
| Aimed at varying PUFA (25)         | -1.80 (-4.11, 0.51)  | -1.19 (-2.73, 0.35) | -2.97 (-4.51, -1.42) | 0.61 (-1.22, 2.44)  | -1.16 (-3.04, 0.71) | -1.77 (-2.80, -0.75) |

\* Abbreviations: CHO, carbohydrates; FA, fatty acids; SFA, saturated fatty acids; MUFA, monounsaturated fatty acids; tFA, trans fatty acids; PUFA, polyunsaturated fatty acids. Values represent the pooled estimated mean change (95% confidence interval) according to isocaloric exchange of two macronutrients with other macronutrient intakes held constant. Effects of replacing CHO with SFA, MUFA, and PUFA by 5% energy amount were estimated by fixed-effects meta-regression, and resulting coefficients were then used for replacement (MUFA-SFA and PUFA-SFA). 1 mg/dL=0.056 mmol/L for glucose, 1 μIU/mL=6 pmol/L, HbA1c mmol/mol=(HbA1c % - 2.15)×10.929.

† Adjusted for intakes of protein, trans-fat, and fibre that varied within trials. Fibre was used to adjust for CHO quality. Trans-fat and protein were adjusted for to allow estimation independent of these macronutrients. For trials without information on trans-fat, intake was imputed by using SFA, MUFA, PUFA, and trial aims (test for trans-fat, yes/no) (see supplementary materials).

‡ Models used two of protein, trans-fat, and fibre for statistical adjustment, rather than three of these. Additional adjustment was made for total energy intake and arm-specific weight change during an intervention (Δweight).

§ Imputation was applied to 213 individual arms of 70 trials from which information on trans-fat was not reported. In the main analysis, regression-based approach was undertaken. In the sensitivity analyses, a ratio of trans-fat to MUFA or MUFA+PUFA or total fat was tested.

|| Meta-analysis was repeated by limiting trials by duration of intervention, implementation of caloric restriction, and specific aims. Analyses based on trials specifically varying certain exposure are generally recommended in multiple-treatment meta-analysis (Salanti et al., Stat Methods Med Res, 2008, Ref. 21 of the main manuscript). Not estimable, when the number of trials were too few.
